# Supplementary material for: Effect of coordinated and lattice neutral co-ligands on the dielectric properties of cadmium and magnesium based coordination polymers
Source: Royal Society of Chemistry journal article supplement (doi:10.1039/d4ce01238k), 2025-01-01
Supplement: d4ce01238k1.pdf [file d4ce01238k1.pdf]

## **Effect of Coordinated and Lattice Neutral Co-ligands on the Dielectric Properties of Cadmium and Magnesium Based Coordination Polymers**

Balendra,<sup>a,b</sup> Mahboob Ali,<sup>c,d</sup> Sanyukta<sup>e</sup> and Sevi Murugavel<sup>d</sup>

<sup>a</sup>Department of Chemistry, Indian Institute of Technology Delhi, Hauz Khas, New Delhi-110016, India

<sup>b</sup>Department of Chemistry, Bhaskaracharya College of Applied Sciences, University of Delhi, Delhi-110021, India.

<sup>c</sup>Department of Physics, Rajdhani College, University of Delhi, Delhi-110015, India

<sup>d</sup>Department of Physics and Astrophysics, University of Delhi, Delhi, 110007, India

<sup>e</sup>Department of Chemistry, Hindu College, University of Delhi, Delhi-110007, India

E-mail: [balendra.iitr@gmail.com](mailto:balendra.iitr@gmail.com)      Tel: +91-8882632779

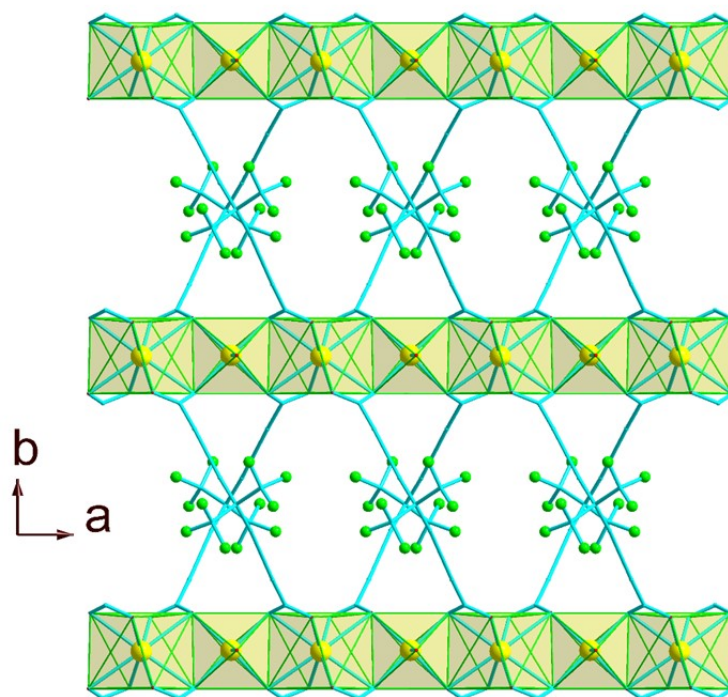

**Fig. S1** Cadmium carboxylate column connected by *FBA* forming a 2D sheet on *ab*-plane in solid **1**.

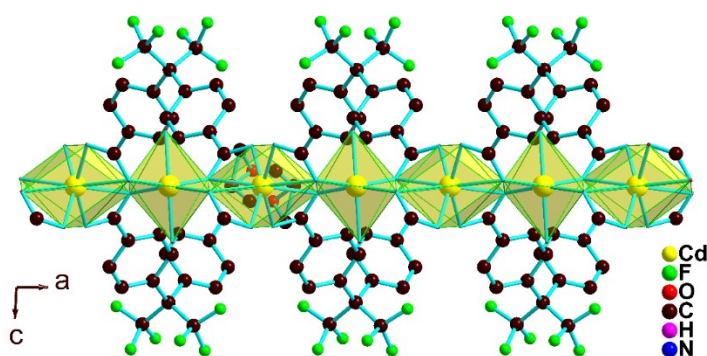

**Fig. S2** Crystal structure of **1** viewed on *ac*-plane showing the linking of cadmium carboxylate column through  $FBA^{2-}$  ligands resulting in a 1D square-shaped channel.

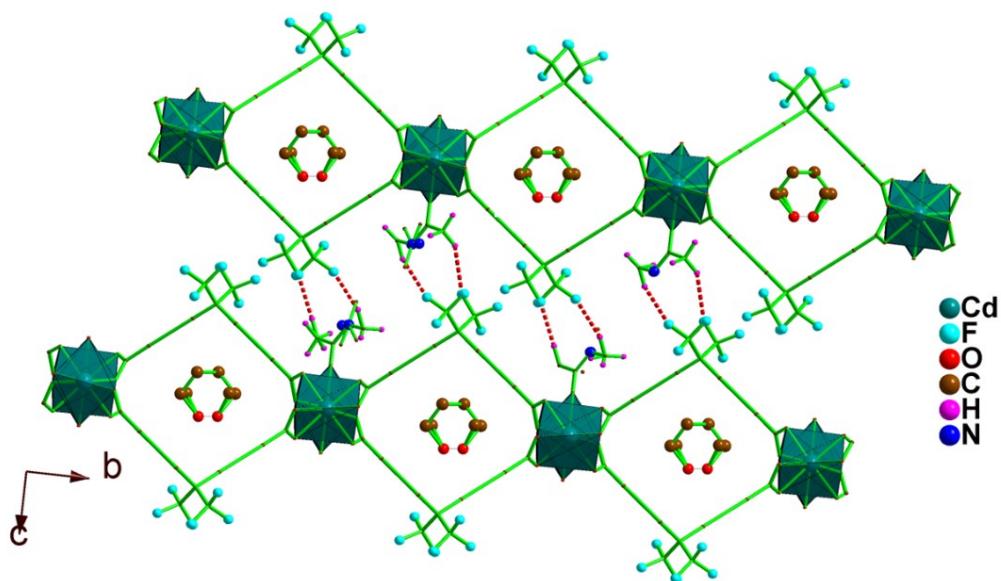

**Fig. S3** Crystal structure of **1** viewed on  $bc$ -plane showing the linking of cadmium carboxylate column through  $FBA^{2-}$  ligands and THF molecules resides in 2D square-shaped channel.

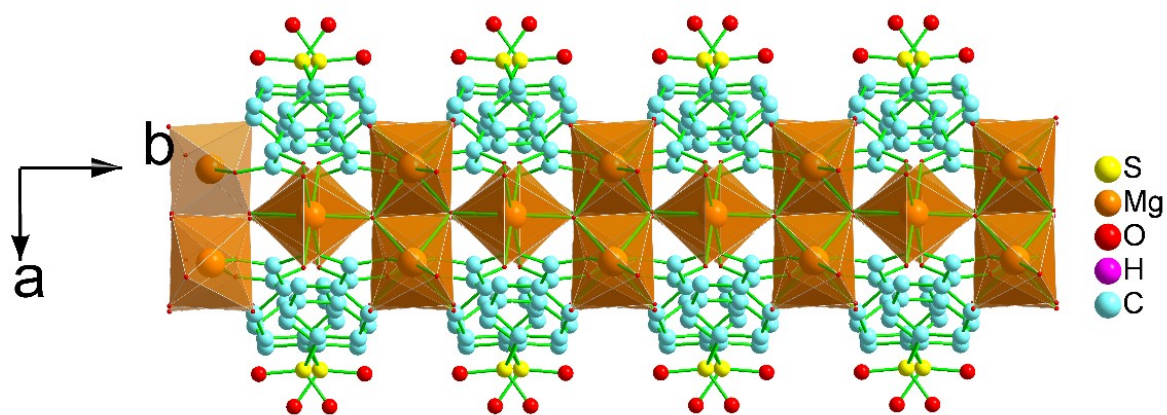

**Fig. S4** (a) 1D chain structure of Solid **2** viewed along the  $c$  axis.

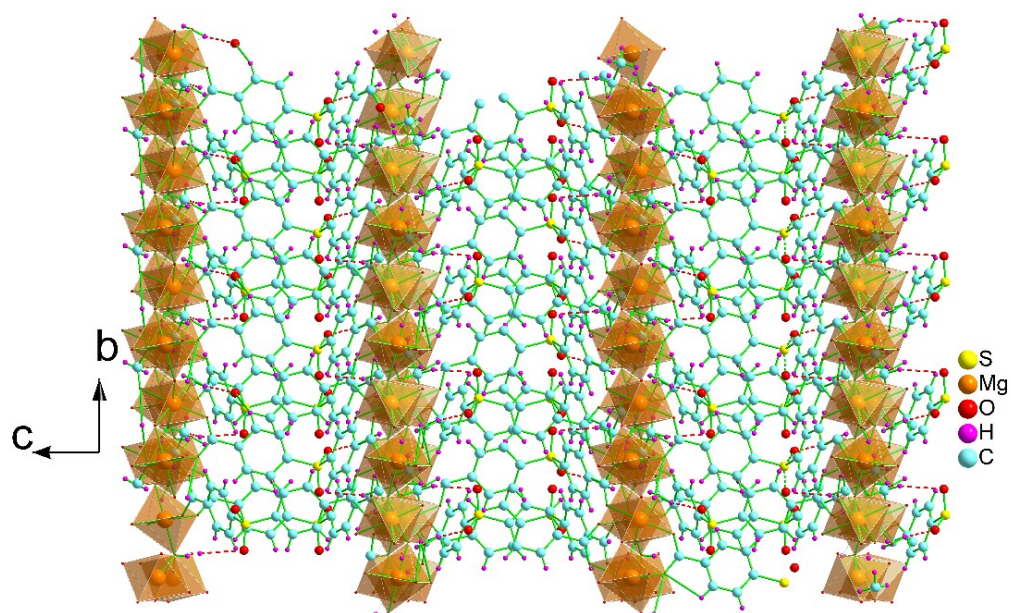

**Fig. S5** 2D structure of Solid **2** resulting from the C–H $\cdots$ O<sub>SBA</sub> interaction between the EtOH molecules and oxygens of SBA<sup>2-</sup> ligands.

**Table S1.** Analysis of Cd1(II) coordination geometry using SHAPE.

|                 | Structure <sup>†</sup> |        |        |              |        |       |        |          |         |        |        |       |         |
|-----------------|------------------------|--------|--------|--------------|--------|-------|--------|----------|---------|--------|--------|-------|---------|
|                 | OP-8                   | HPY-8  | HBPY-8 | CU-8         | SAPR-8 | TD-8  | JGBF-8 | JETBPY-8 | JBTPR-8 | BTPR-8 | JSD-8  | TT-8  | ETBPY-8 |
| <b>Cd1_CShM</b> | 30.518                 | 23.131 | 10.600 | <b>3.686</b> | 11.873 | 9.317 | 15.722 | 19.566   | 13.789  | 13.650 | 15.107 | 4.551 | 18.981  |

<sup>†</sup>OP-8: Octagon ( $D_{8h}$ ); HPY-8: Heptagonal pyramid ( $C_{7v}$ ); HBPY-8: Hexagonal bipyramid ( $D_{6h}$ ); CU-8 Cube ( $O_h$ ); SAPR-8: Square antiprism ( $D_{4d}$ ); TDD-8: Triangular dodecahedron ( $D_{2d}$ ); JGBF-8: Johnson gyrobifastigium J26 ( $D_{2d}$ ); JETBPY-8: Johnson elongated triangular bipyramid J14 ( $D_{3h}$ ); JBTPR-8: Biaugmented trigonal prism J50 ( $C_{2v}$ ); BTPR-8: Biaugmented trigonal prism ( $C_{2v}$ ); JSD-8 Snub diphenooid J84 ( $D_{2d}$ ); TT-8: Triakis tetrahedron ( $T_d$ ) ETBPY-8: Elongated trigonal bipyramid ( $D_{3h}$ )

**Table S2.** Analysis of Cd2(II) coordination geometry using SHAPE.

|                 | Structure <sup>†</sup> |        |              |        |        |
|-----------------|------------------------|--------|--------------|--------|--------|
|                 | HP-6                   | PPY-6  | OC-6         | TPR-6  | JPPY-6 |
| <b>Cd2_CShM</b> | 30.680                 | 24.187 | <b>1.112</b> | 12.188 | 27.678 |

<sup>†</sup>HP-6: Hexagon ( $D_{6h}$ ); PPY-6: Pentagonal pyramid ( $C_{5v}$ ); OC-6: Octahedron ( $O_h$ ); TPR-6: Trigonal prism ( $D_{3h}$ ); JPPY-6: Johnson pentagonal pyramid J2 ( $C_{5v}$ )

## Various combination of cadmium salts and V-shaped ligands applied for the synthesis of Solid 1

The reaction between different cadmium salts and 4,4' (hexafluoroisopropylidene)bisbenzoic acid was carried out in various combinations of polar aprotic solvents at different temperature. The composition of cadmium salts (0.30 mmol), *H<sub>2</sub>FBA* ligand (0.15 mmol), and Phen (0.15 mmol) were kept constant. Every solution was 30 minutes magnetically stirred in beaker and were Teflon's sealed off and the synthesis was completed in an 8 ml reactor system. For crystal formation suitable for X-ray diffraction, the reaction was conducted in the temperature range 120-140 °C which was suitable to get the crystalline phase as per suggested by the database analysis. The outcome of the products resulted in a variety of phases, including liquid, powder, and crystalline. Only the data of solid 1 was solved using the single crystal diffraction method. By varying the metal, ligand, and solvent composition, this synthesis screening also raised the possibility of new phases.

**Table S3: Outcome of the reactions between cadmium salts, *H<sub>2</sub>FBA*, Phen with DMA, H<sub>2</sub>O and THF.**

| S.No | Metal salt                                                       | Solvent/solvent combinations   | Solution after stirring about 30 minutes | Teflon (size) | Temperature (°C) and duration | Result                                                                                                      |
|------|------------------------------------------------------------------|--------------------------------|------------------------------------------|---------------|-------------------------------|-------------------------------------------------------------------------------------------------------------|
| (1)  | Cd(NO <sub>3</sub> ) <sub>2</sub> ·4H <sub>2</sub> O (0.30 mmol) | DMA (8ml)                      | Yellow colour homogenous solution        | 8ml           | 140 °C for 4 days             | Powder                                                                                                      |
| (2)  | Cd(NO <sub>3</sub> ) <sub>2</sub> ·4H <sub>2</sub> O (0.30 mmol) | DMA/H <sub>2</sub> O (4ml/4ml) | Colourless solution                      | 8ml           | 140 °C for 4 days             | Powder                                                                                                      |
| (3)  | Cd(NO <sub>3</sub> ) <sub>2</sub> ·4H <sub>2</sub> O (0.30 mmol) | DMA/EtOH (4ml/4ml)             | Colourless homogenous solution           | 8ml           | 140 °C for 4 days             | Block shape colourless crystals [Cd <sub>2</sub> (FBA) <sub>2</sub> (phen) <sub>2</sub> ]. DMA <sup>1</sup> |
| (4)  | Cd(NO <sub>3</sub> ) <sub>2</sub> ·4H <sub>2</sub> O (0.30 mmol) | DMA/MeOH (4ml/4ml)             | Colourless homogenous solution           | 8ml           | 140 °C for 4 days             | Powder                                                                                                      |
| (5)  | Cd(NO <sub>3</sub> ) <sub>2</sub> ·4H <sub>2</sub> O (0.30 mmol) | DMA/THF (4ml/4ml)              | Colourless homogenous solution           |               | 140 °C for 4 days             | Needle shape crystal of <b>Solid 1</b>                                                                      |
| (6)  | Cd(OAc) <sub>2</sub> ·2H <sub>2</sub> O (0.30 mmol)              | DMA (8ml)                      | White colour solution                    | 8ml           | 140 °C for 4 days             | Powder                                                                                                      |
| (7)  | Cd(OAc) <sub>2</sub> ·2H <sub>2</sub> O (0.30 mmol)              | DMA/H <sub>2</sub> O (4ml/4ml) | Milky white colour solution              | 8ml           | 140 °C for 4 days             | Powder                                                                                                      |
| (8)  | Cd(OAc) <sub>2</sub> ·2H <sub>2</sub> O (0.30 mmol)              | DMA/EtOH (4ml/4ml)             | Milky white colour solution              | 8ml           | 140 °C for 4 days             | Colourless very fine crystals<br>Very poor diffracting                                                      |
| (9)  | Cd(OAc) <sub>2</sub> ·2H <sub>2</sub> O (0.30 mmol)              | DMA/MeOH (4ml/4ml)             | Milky white colour solution              | 8ml           | 140 °C for 4 days             | Clear solution                                                                                              |

|      |                                                                     |                                   |                                |     |                   |                                                                                         |
|------|---------------------------------------------------------------------|-----------------------------------|--------------------------------|-----|-------------------|-----------------------------------------------------------------------------------------|
|      | $\text{Cd}(\text{OAc})_2 \cdot 2\text{H}_2\text{O}$<br>(0.30 mmol)  | DMA/THF<br>(4ml/4ml)              | Milky white colour solution    | 8ml | 140 °C for 4 days | Needle shape crystals Poor diffracting                                                  |
| (10) | $\text{CdCl}_2 \cdot 4\text{H}_2\text{O}$<br>(0.30 mmol)            | DMA<br>(8ml)                      | Colourless homogenous solution | 8ml | 140 °C for 4 days | Powder                                                                                  |
| (11) | $\text{CdCl}_2 \cdot 4\text{H}_2\text{O}$<br>(0.30 mmol)            | DMA/H <sub>2</sub> O<br>(4ml/4ml) | Milky white colour solution    | 8ml | 140 °C for 4 days | Powder                                                                                  |
| (12) | $\text{CdCl}_2 \cdot 4\text{H}_2\text{O}$<br>(0.30 mmol)            | DMA/EtOH<br>(4ml/4ml)             | Colourless homogenous solution | 8ml | 140 °C for 4 days | Colourless very fine crystals<br>Poor diffracting                                       |
| (13) | $\text{CdCl}_2 \cdot 4\text{H}_2\text{O}$<br>(0.30 mmol)            | DMA/MeOH<br>(4ml/4ml)             | Colourless homogenous solution | 8ml | 140 °C for 4 days | Powder                                                                                  |
| (14) | $\text{CdCl}_2 \cdot 4\text{H}_2\text{O}$<br>(0.30 mmol)            | DMA/THF<br>(4ml/4ml)              | Colourless homogenous solution | 8ml | 140 °C for 4 days | Needle shaped crystals; cell parameter matched with <b>solid 1</b> but could not solved |
| (15) | $\text{Cd}(\text{NO}_3)_2 \cdot 4\text{H}_2\text{O}$<br>(0.30 mmol) | DMA<br>(8ml)                      | Colourless homogenous solution | 8ml | 120 °C for 4 days | Powder                                                                                  |
| (16) | $\text{Cd}(\text{NO}_3)_2 \cdot 4\text{H}_2\text{O}$<br>(0.30 mmol) | DMA/H <sub>2</sub> O<br>(4ml/4ml) | Colourless solution            | 8ml | 120 °C for 4 days | Needle shaped crystals: Poorly diffracting                                              |
| (17) | $\text{Cd}(\text{NO}_3)_2 \cdot 4\text{H}_2\text{O}$<br>(0.30 mmol) | DMA/EtOH<br>(4ml/4ml)             | White colour solution          | 8ml | 120 °C for 4 days | Block shaped crystal: Poorly diffracting                                                |
| (18) | $\text{Cd}(\text{NO}_3)_2 \cdot 4\text{H}_2\text{O}$<br>(0.30 mmol) | DMA/MeOH<br>(4ml/4ml)             | Milky white colour solution    | 8ml | 120 °C for 4 days | Powder                                                                                  |
| (19) | $\text{Cd}(\text{NO}_3)_2 \cdot 4\text{H}_2\text{O}$<br>(0.30 mmol) | DMA/THF<br>(4ml/4ml)              | White colour solution          | 8ml | 120 °C for 4 days | Needle shaped crystal of <b>solid 1</b>                                                 |
| (20) | $\text{Cd}(\text{OAc})_2 \cdot 2\text{H}_2\text{O}$<br>(0.30 mmol)  | DMA<br>(8ml)                      | White colour solution          | 8ml | 120 °C for 4 days | Powder                                                                                  |
| (21) | $\text{Cd}(\text{OAc})_2 \cdot 2\text{H}_2\text{O}$<br>(0.30 mmol)  | DMA/H <sub>2</sub> O<br>(4ml/4ml) | Colourless homogenous solution | 8ml | 120 °C for 4 days | Powder                                                                                  |
| (22) | $\text{Cd}(\text{OAc})_2 \cdot 2\text{H}_2\text{O}$<br>(0.30 mmol)  | DMA/EtOH<br>(4ml/4ml)             | Colourless homogenous solution | 8ml | 120 °C for 4 days | Colourless very fine crystals<br>Very poor diffracting                                  |
| (23) | $\text{Cd}(\text{OAc})_2 \cdot 2\text{H}_2\text{O}$<br>(0.30 mmol)  | DMA/MeOH<br>(4ml/4ml)             | Milky white colour solution    | 8ml | 120 °C for 4 days | Clear solution                                                                          |
|      | $\text{Cd}(\text{OAc})_2 \cdot 2\text{H}_2\text{O}$<br>(0.30 mmol)  | DMA/THF<br>(4ml/4ml)              | Milky white colour solution    | 8ml | 120 °C for 4 days | Powder                                                                                  |
| (24) | $\text{CdCl}_2 \cdot 4\text{H}_2\text{O}$<br>(0.30 mmol)            | DMA/EtOH<br>(4ml/4ml)             | Colourless homogenous solution | 8ml | 120 °C for 4 days | Powder                                                                                  |
| (25) | $\text{CdCl}_2 \cdot 4\text{H}_2\text{O}$<br>(0.30 mmol)            | DMA/MeOH<br>(4ml/4ml)             | Colourless homogenous solution | 8ml | 120 °C for 4 days | Powder                                                                                  |
| (26) | $\text{CdCl}_2 \cdot 4\text{H}_2\text{O}$<br>(0.30 mmol)            | DMA/THF<br>(4ml/4ml)              | Colourless homogenous solution | 8ml | 120 °C for 4 days | Powder                                                                                  |

## Outcomes of the reactions

The Phen is incorporated in the structure suggesting it is working as template for the crystallization of solid **1**. The reaction without Phen resulted the powder phase as the end product which couldn't be characterized through single crystals. Solid  $[\text{Cd}_2(\text{FBA})_2(\text{phen})_2]$ .DMA reported by our group was also obtained in the crystalline phase which were confirmed by checking the cell parameters on single crystals diffraction.

## Various combination of cadmium salts and SBA ligand applied for the synthesis of solid

2

Magnesium salts and 4,4'-sulfonyldibenzoic acid were reacted in various combinations of polar aprotic solvents at different temperatures. The composition of salts (1 mmol) and ligand *H<sub>2</sub>SBA* (0.50 mmol) were kept constant. Each solution was magnetically agitated in a beaker for 30 minutes before being sealed with Teflon and the synthesis was completed in an 8 ml reactor setup. The reaction was carried out at temperatures ranging from 120 to 130 °C, which were appropriate for obtaining the crystalline phase suggested by the database analysis. The reactions resulted in variety of phases, including liquid, powder, and crystalline. Only the data of new phase solid **2** was solved using the single crystal diffraction method.

**Table S4: Outcome of the reactions between Magnesium salts, *H<sub>2</sub>SBA* and various solvents.**

| S. No | Metal salt                                                    | Solvent/solvent combinations   | Solution after stirring about 30 minutes | Teflon (size) | Temperature (°C) and duration | Result                                                                                  |
|-------|---------------------------------------------------------------|--------------------------------|------------------------------------------|---------------|-------------------------------|-----------------------------------------------------------------------------------------|
| (1)   | MgCl <sub>2</sub> ·4H <sub>2</sub> O (1 mmol)                 | DMA (8ml)                      | Milky white colour solution              | 8ml           | 130 °C for 4 days             | Powder                                                                                  |
| (2)   | MgCl <sub>2</sub> ·4H <sub>2</sub> O (1 mmol)                 | DMA/H <sub>2</sub> O (4ml/4ml) | Colourless solution                      | 8ml           | 130 °C for 4 days             | Needle shaped crystals: Poorly diffracting                                              |
| (3)   | MgCl <sub>2</sub> ·4H <sub>2</sub> O (1 mmol)                 | DMA/EtOH (4ml/4ml)             | Colourless homogenous solution           | 8ml           | 130 °C for 4 days             | Needle shaped crystal of <b>Solid 2</b>                                                 |
| (4)   | MgCl <sub>2</sub> ·4H <sub>2</sub> O (1 mmol)                 | DMA/MeOH (4ml/4ml)             | Colourless homogenous solution           | 8ml           | 130 °C for 4 days             | Powder                                                                                  |
| (5)   | MgCl <sub>2</sub> ·4H <sub>2</sub> O (1 mmol)                 | DMA/THF (4ml/4ml)              | Colourless homogenous solution           |               | 130 °C for 4 days             | Powder                                                                                  |
| (6)   | Mg(OAc) <sub>2</sub> ·4H <sub>2</sub> O (1 mmol)              | DMA (8ml)                      | White colour solution                    | 8ml           | 130 °C for 4 days             | Powder                                                                                  |
| (7)   | Mg(OAc) <sub>2</sub> ·4H <sub>2</sub> O (1 mmol)              | DMA/H <sub>2</sub> O (4ml/4ml) | Milky white colour solution              | 8ml           | 130 °C for 4 days             | Powder                                                                                  |
| (8)   | Mg(OAc) <sub>2</sub> ·4H <sub>2</sub> O (1 mmol)              | DMA/EtOH (4ml/4ml)             | Milky white colour solution              | 8ml           | 130 °C for 4 days             | Needle shaped crystals; cell parameter matched with Solid <b>2</b> but could not solved |
| (9)   | Mg(NO <sub>3</sub> ) <sub>2</sub> ·6H <sub>2</sub> O (1 mmol) | DMA/MeOH (4ml/4ml)             | Milky white colour solution              | 8ml           | 130 °C for 4 days             | Clear solution                                                                          |
|       | Mg(NO <sub>3</sub> ) <sub>2</sub> ·6H <sub>2</sub> O (1 mmol) | DMA/THF (4ml/4ml)              | Milky white colour solution              | 8ml           | 130 °C for 4 days             | Powder                                                                                  |
| (10)  | Mg(NO <sub>3</sub> ) <sub>2</sub> ·6H <sub>2</sub> O (1 mmol) | DMA (8ml)                      | Colourless homogenous solution           | 8ml           | 130 °C for 4 days             | Powder                                                                                  |
| (11)  | Mg(NO <sub>3</sub> ) <sub>2</sub> ·6H <sub>2</sub> O (1 mmol) | DMA/H <sub>2</sub> O (4ml/4ml) | Milky white colour solution              | 8ml           | 130 °C for 4 days             | Powder                                                                                  |



|      |                                                                  |                                   |                                   |     |                      |                                                              |
|------|------------------------------------------------------------------|-----------------------------------|-----------------------------------|-----|----------------------|--------------------------------------------------------------|
| (12) | Mg(NO <sub>3</sub> ) <sub>2</sub> ·6H <sub>2</sub> O<br>(1 mmol) | DMA/EtOH<br>(4ml/4ml)             | Colourless homogenous<br>solution | 8ml | 130 °C for 4<br>days | Colourless very<br>fine crystals<br>Poor diffracting         |
| (13) | Mg(NO <sub>3</sub> ) <sub>2</sub> ·6H <sub>2</sub> O<br>(1 mmol) | DMA/MeO<br>H<br>(4ml/4ml)         | Colourless homogenous<br>solution | 8ml | 130 °C for 4<br>days | Powder                                                       |
| (14) | Mg(NO <sub>3</sub> ) <sub>2</sub> ·6H <sub>2</sub> O<br>(1 mmol) | DMA/THF<br>(4ml/4ml)              | Colourless homogenous<br>solution | 8ml | 130 °C for 4<br>days | Powder                                                       |
| (15) | MgCl <sub>2</sub> ·4H <sub>2</sub> O<br>(1 mmol)                 | DMA<br>(8ml)                      | Colourless homogenous<br>solution | 8ml | 120 °C for 4<br>days | Powder                                                       |
| (16) | MgCl <sub>2</sub> ·4H <sub>2</sub> O<br>(1 mmol)                 | DMA/H <sub>2</sub> O<br>(4ml/4ml) | Colourless solution               | 8ml | 120 °C for 4<br>days | Needle shaped<br>crystals: Poorly<br>diffracting             |
| (17) | MgCl <sub>2</sub> ·4H <sub>2</sub> O<br>(1 mmol)                 | DMA/EtOH<br>(4ml/4ml)             | White colour solution             | 8ml | 120 °C for 4<br>days | Needle shaped<br>crystal <b>Solid 2</b>                      |
| (18) | MgCl <sub>2</sub> ·4H <sub>2</sub> O<br>(1 mmol)                 | DMA/MeO<br>H<br>(4ml/4ml)         | Milky white colour<br>solution    | 8ml | 120 °C for 4<br>days | Powder                                                       |
| (19) | MgCl <sub>2</sub> ·4H <sub>2</sub> O<br>(1 mmol)                 | DMA/THF<br>(4ml/4ml)              | White colour solution             | 8ml | 120 °C for 4<br>days | Needle shaped<br>crystal Poorly<br>diffracting               |
| (20) | Mg(OAc) <sub>2</sub> ·4H <sub>2</sub> O<br>(1 mmol)              | DMA<br>(8ml)                      | White colour solution             | 8ml | 120 °C for 4<br>days | Powder                                                       |
| (21) | Mg(OAc) <sub>2</sub> ·4H <sub>2</sub> O<br>(1 mmol)              | DMA/H <sub>2</sub> O<br>(4ml/4ml) | Colourless homogenous<br>solution | 8ml | 120 °C for 4<br>days | Powder                                                       |
| (22) | Mg(OAc) <sub>2</sub> ·4H <sub>2</sub> O<br>(1 mmol)              | DMA/EtOH<br>(4ml/4ml)             | Colourless homogenous<br>solution | 8ml | 120 °C for 4<br>days | Colourless very<br>fine crystals<br>Very poor<br>diffracting |
| (23) | Mg(OAc) <sub>2</sub> ·4H <sub>2</sub> O<br>(1 mmol)              | DMA/MeO<br>H<br>(4ml/4ml)         | Milky white colour<br>solution    | 8ml | 120 °C for 4<br>days | Clear solution                                               |
|      | Mg(OAc) <sub>2</sub> ·4H <sub>2</sub> O<br>(1 mmol)              | DMA/THF<br>(4ml/4ml)              | Milky white colour<br>solution    | 8ml | 120 °C for 4<br>days | Powder                                                       |
| (24) | Mg(NO <sub>3</sub> ) <sub>2</sub> ·6H <sub>2</sub> O<br>(1 mmol) | DMA/EtOH<br>(4ml/4ml)             | Colourless homogenous<br>solution | 8ml | 120 °C for 4<br>days | Powder                                                       |
| (25) | Mg(NO <sub>3</sub> ) <sub>2</sub> ·6H <sub>2</sub> O<br>(1 mmol) | DMA/MeO<br>H<br>(4ml/4ml)         | Colourless homogenous<br>solution | 8ml | 120 °C for 4<br>days | Powder                                                       |
| (26) | Mg(NO <sub>3</sub> ) <sub>2</sub> ·6H <sub>2</sub> O<br>(1 mmol) | DMA/THF<br>(4ml/4ml)              | Colourless homogenous<br>solution | 8ml | 120 °C for 4<br>days | Powder                                                       |

### Outcomes of the reactions

The screening of the reactions suggested the temperature 120 °C and 130 °C were the suitable for the aggregation of the molecules in the crystalline phase. The variation in the composition of the ligand and salts resulted mostly the powder form of the product. The solid **2** crystalline phase was obtained when the same concentration of different salts of magnesium were used.

# EIS software data fitting Report

## Solid 1.

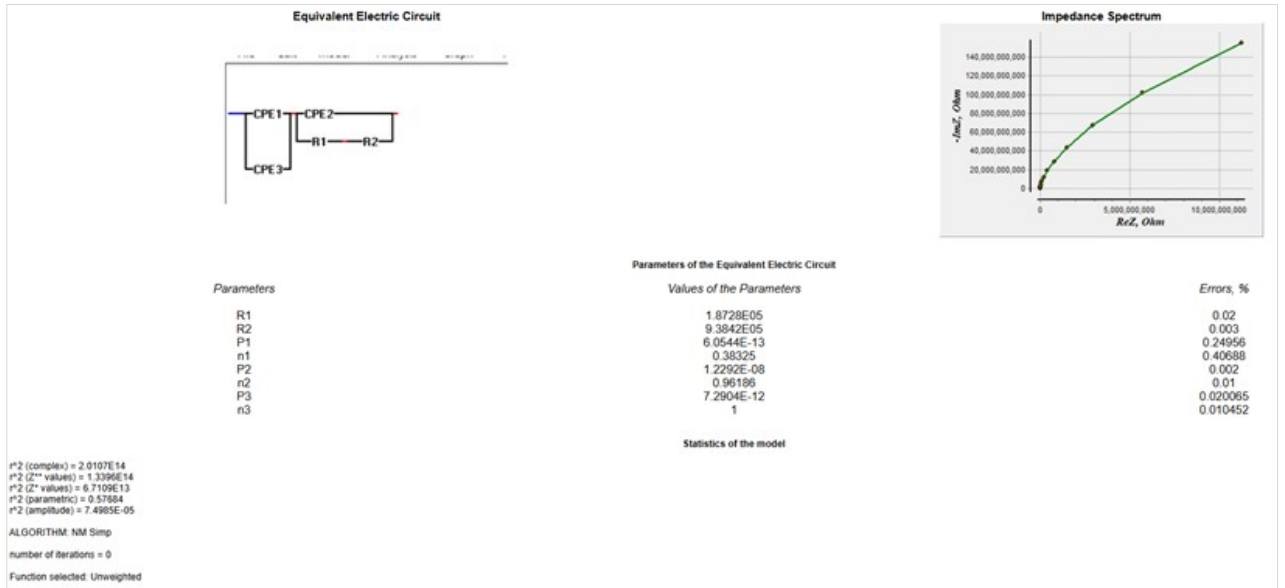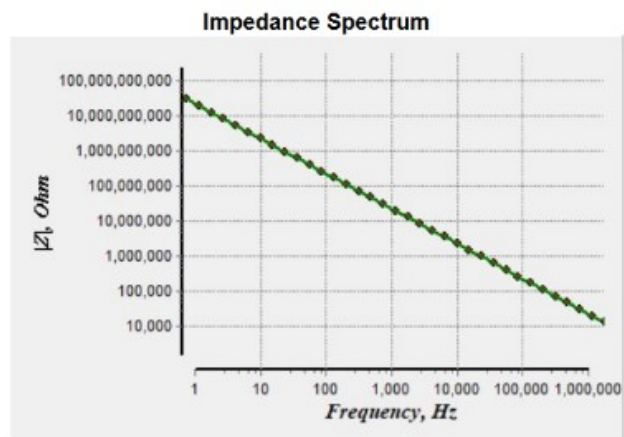

## Solid 2.

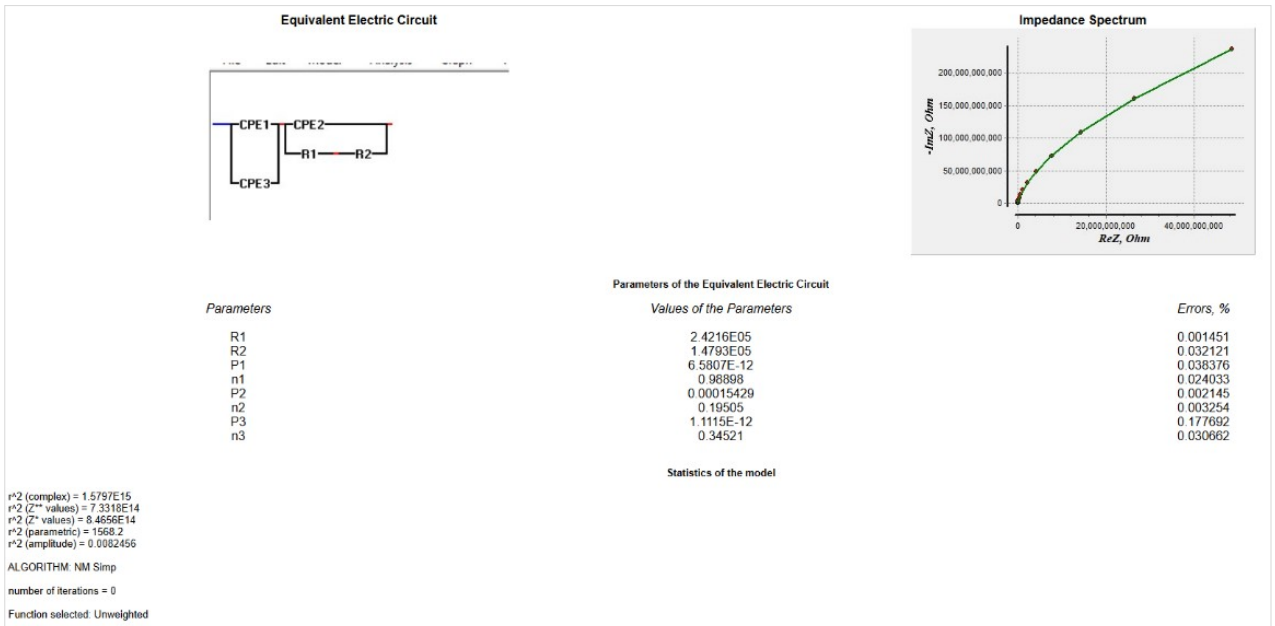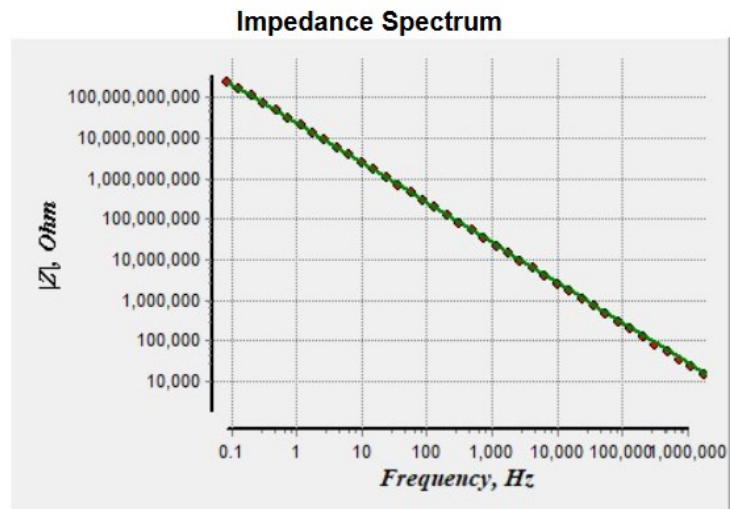

# Solid 1'

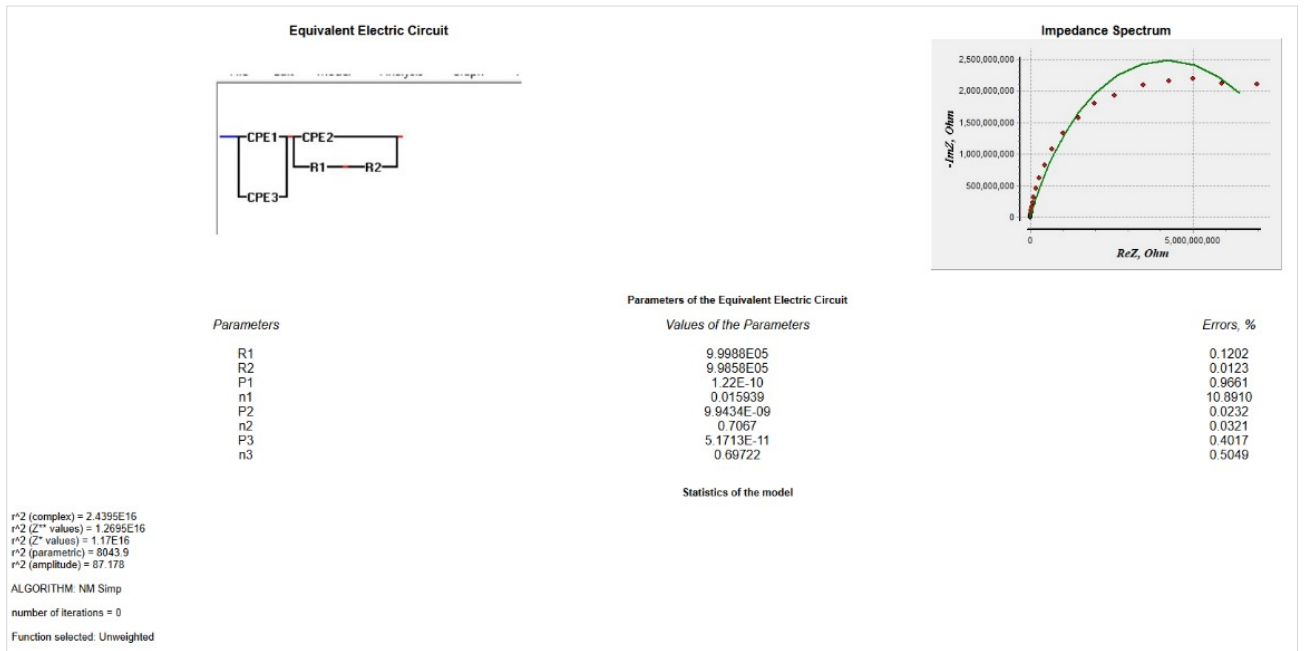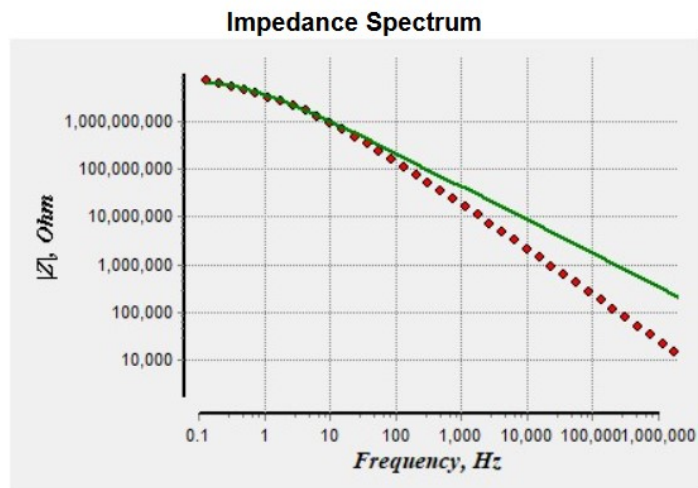

# Solid 2'

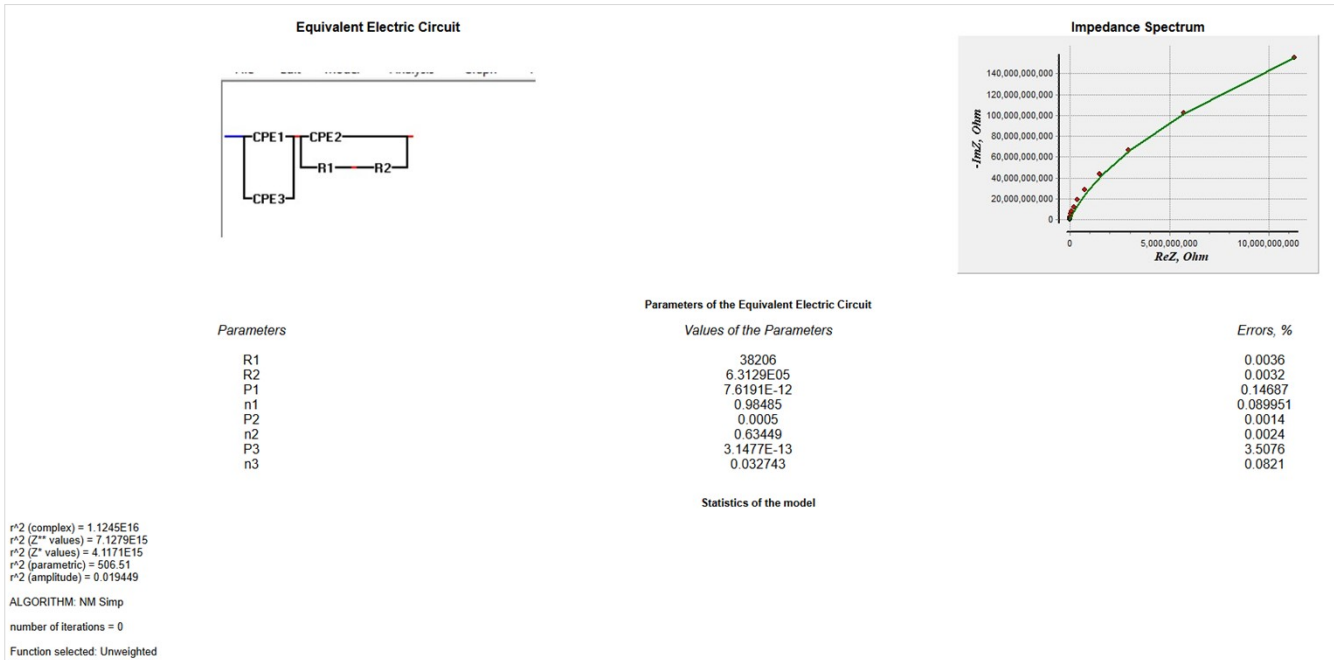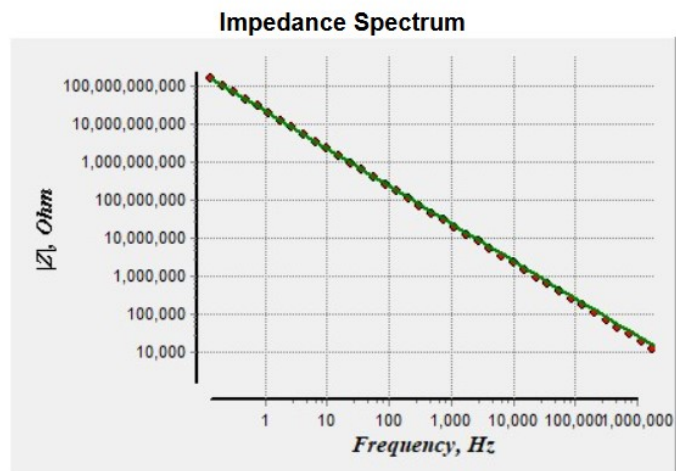

## Solid1

**$R_1=4.29\%$**

### Crystal Data and Experimental

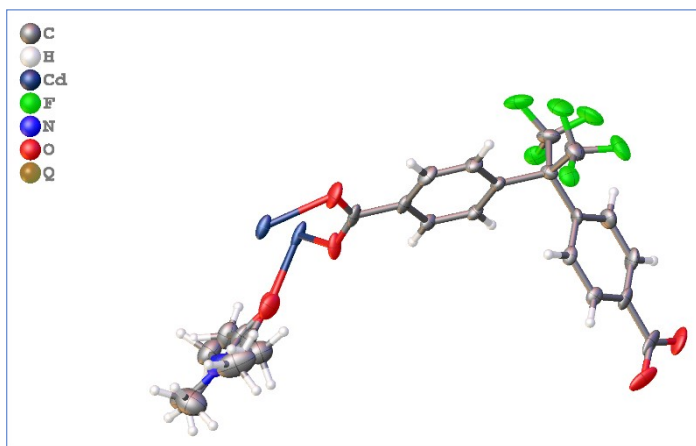

**Experimental.** Single Colorless needle shape-shaped crystals of **Solid1** were used as supplied. A suitable crystal with dimensions  $0.32 \times 0.21 \times 0.12 \text{ mm}^3$  was selected and mounted on a Bruker APEX-II CCD diffractometer. The crystal was kept at a steady  $T = 100(2) \text{ K}$  during data collection. The structure was solved with the olex2.solve 1.5 (Bourhis et al., 2015) solution program using iterative methods and by using Olex2 1.5 (Dolomanov et al., 2009) as the graphical interface. The model was refined with XL (Sheldrick, 2008) using full matrix least squares minimisation on  $F^2$ .

**Crystal Data.**  $\text{C}_{23}\text{H}_{21}\text{CdF}_6\text{NO}_{5.5}$ ,  $M_r = 625.81$ , monoclinic,  $P2_1/n$  (No. 13),  $a = 7.5048(14) \text{ \AA}$ ,  $b = 12.3263(19) \text{ \AA}$ ,  $c = 26.274(5) \text{ \AA}$ ,  $\beta = 92.904(5)^\circ$ ,  $\alpha = \gamma = 90^\circ$ ,  $V = 2427.4(8) \text{ \AA}^3$ ,  $T = 100(2) \text{ K}$ ,  $Z = 4$ ,  $Z' = 1$ ,  $\mu(\text{MoK}\alpha) = 0.983$ , 36864 reflections measured, 4522 unique ( $R_{\text{int}} = 0.0968$ ) which were used in all calculations. The final  $wR_2$  was 0.0893 (all data) and  $R_1$  was 0.0429 ( $I \geq 2 \sigma(I)$ ).

| Compound                                       | Solid1                                                             |
|------------------------------------------------|--------------------------------------------------------------------|
| Formula                                        | C <sub>23</sub> H <sub>21</sub> CdF <sub>6</sub> NO <sub>5.5</sub> |
| <i>D</i> <sub>calc.</sub> / g cm <sup>-3</sup> | 1.712                                                              |
| $\mu$ /mm <sup>-1</sup>                        | 0.983                                                              |
| Formula Weight                                 | 625.81                                                             |
| Colour                                         | Colorless                                                          |
| Shape                                          | needle shape-shaped                                                |
| Size/mm <sup>3</sup>                           | 0.32×0.21×0.12                                                     |
| <i>T</i> /K                                    | 100(2)                                                             |
| Crystal System                                 | monoclinic                                                         |
| Space Group                                    | <i>P</i> 2/ <i>n</i>                                               |
| <i>a</i> /Å                                    | 7.5048(14)                                                         |
| <i>b</i> /Å                                    | 12.3263(19)                                                        |
| <i>c</i> /Å                                    | 26.274(5)                                                          |
| $\alpha$ /°                                    | 90                                                                 |
| $\beta$ /°                                     | 92.904(5)                                                          |
| $\gamma$ /°                                    | 90                                                                 |
| <i>V</i> /Å <sup>3</sup>                       | 2427.4(8)                                                          |
| <i>Z</i>                                       | 4                                                                  |
| <i>Z</i> '                                     | 1                                                                  |
| Wavelength/Å                                   | 0.71073                                                            |
| Radiation type                                 | MoK $\alpha$                                                       |
| $\theta$ <sub>min</sub> /°                     | 2.267                                                              |
| $\theta$ <sub>max</sub> /°                     | 25.500                                                             |
| Measured Refl's.                               | 36864                                                              |
| Indep't Refl's                                 | 4522                                                               |
| Refl's I $\geq$ 2 $\sigma$ (I)                 | 3061                                                               |
| <i>R</i> <sub>int</sub>                        | 0.0968                                                             |
| Parameters                                     | 378                                                                |
| Restraints                                     | 90                                                                 |
| Largest Peak                                   | 0.515                                                              |
| Deepest Hole                                   | -0.727                                                             |
| Goof                                           | 1.045                                                              |
| <i>wR</i> <sub>2</sub> (all data)              | 0.0893                                                             |
| <i>wR</i> <sub>2</sub>                         | 0.0795                                                             |
| <i>R</i> <sub>1</sub> (all data)               | 0.0838                                                             |
| <i>R</i> <sub>1</sub>                          | 0.0429                                                             |

## Structure Quality Indicators

|                     |                                            |       |                 |      |                |       |            |       |
|---------------------|--------------------------------------------|-------|-----------------|------|----------------|-------|------------|-------|
| <b>Reflections:</b> | d min (MoK $\alpha$ )<br>2 $\theta$ =51.0° | 0.83  | I/ $\sigma$ (I) | 16.4 | Rint<br>m=8.38 | 9.68% | Full 50.5° | 99.8  |
| <b>Refinement:</b>  | Shift                                      | 0.000 | Max Peak        | 0.5  | Min Peak       | -0.7  | Goof       | 1.045 |

A Colorless needle shape-shaped crystal with dimensions 0.32 × 0.21 × 0.12 mm<sup>3</sup> was mounted. Data were collected using a Bruker APEX-II CCD diffractometer operating at  $T = 100(2)$  K.

Data were measured using  $\phi$  and  $\omega$  scans with MoK $\alpha$  radiation. The diffraction pattern was indexed and the total number of runs and images was based on the strategy calculation from the program Bruker D8 Quest. The maximum resolution that was achieved was  $\theta = 25.500^\circ$  (0.83 Å).

The unit cell was refined using SAINT v8.37A (Bruker, 2015) on 917 reflections, 2% of the observed reflections.

Data reduction, scaling and absorption corrections were performed using SAINT v8.37A (Bruker, 2015). The final completeness is 99.80 % out to 25.500° in  $\theta$ . No absorption correction was performed. The absorption coefficient  $\mu$  of this material is 0.983 mm<sup>-1</sup> at this wavelength ( $\lambda = 0.71073\text{Å}$ ) and the minimum and maximum transmissions are 0.780 and 0.888.

The structure was solved and the space group  $P2_1/n$  (# 13) determined by the olex2.solve 1.5 (Bourhis et al., 2015) structure solution program using iterative methods and refined by full matrix least squares minimisation on  $F^2$  using version 2014/7 of XL (Sheldrick, 2008). All non-hydrogen atoms were refined anisotropically. Hydrogen atom positions were calculated geometrically and refined using the riding model. Most hydrogen atom positions were calculated geometrically and refined using the riding model, but some hydrogen atoms were refined freely.

*\_exptl\_absorpt\_process\_details:* SADABS-2016/2 (Bruker,2016/2) was used for absorption correction.  $wR_2(\text{int})$  was 0.0968 before and 0.0559 after correction. The Ratio of minimum to maximum transmission is 0.9252. The  $\lambda/2$  correction factor is Not present.

*\_smbx\_masks\_special\_details:* A solvent mask was calculated and 84 electrons were found in a volume of 336Å<sup>3</sup> in 1 void per unit cell. This is consistent with the presence of 1[C4H8O] per Formula Unit which account for 80 electrons per unit cell.

There is a single formula unit in the asymmetric unit, which is represented by the reported sum formula. In other words: Z is 4 and Z' is 1. The moiety formula is C21 H17 Cd F6 N O5, 0.5[C4H8O].

## Data Plots: Diffraction Data

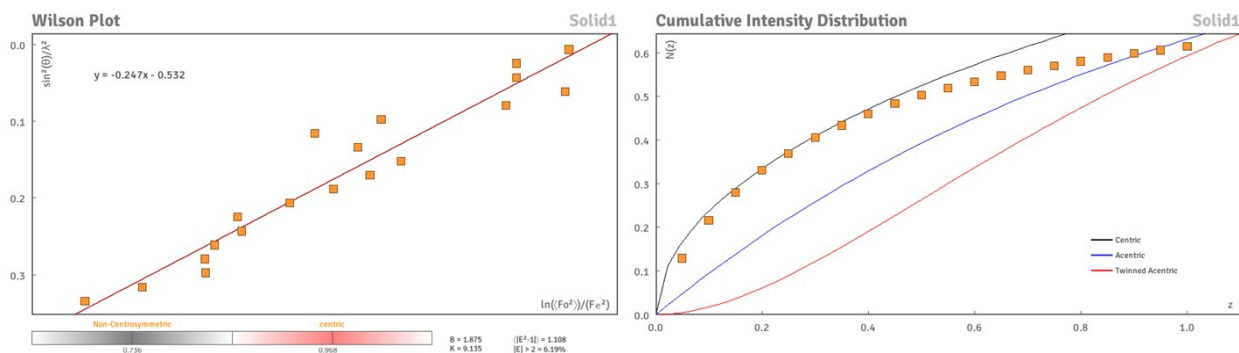



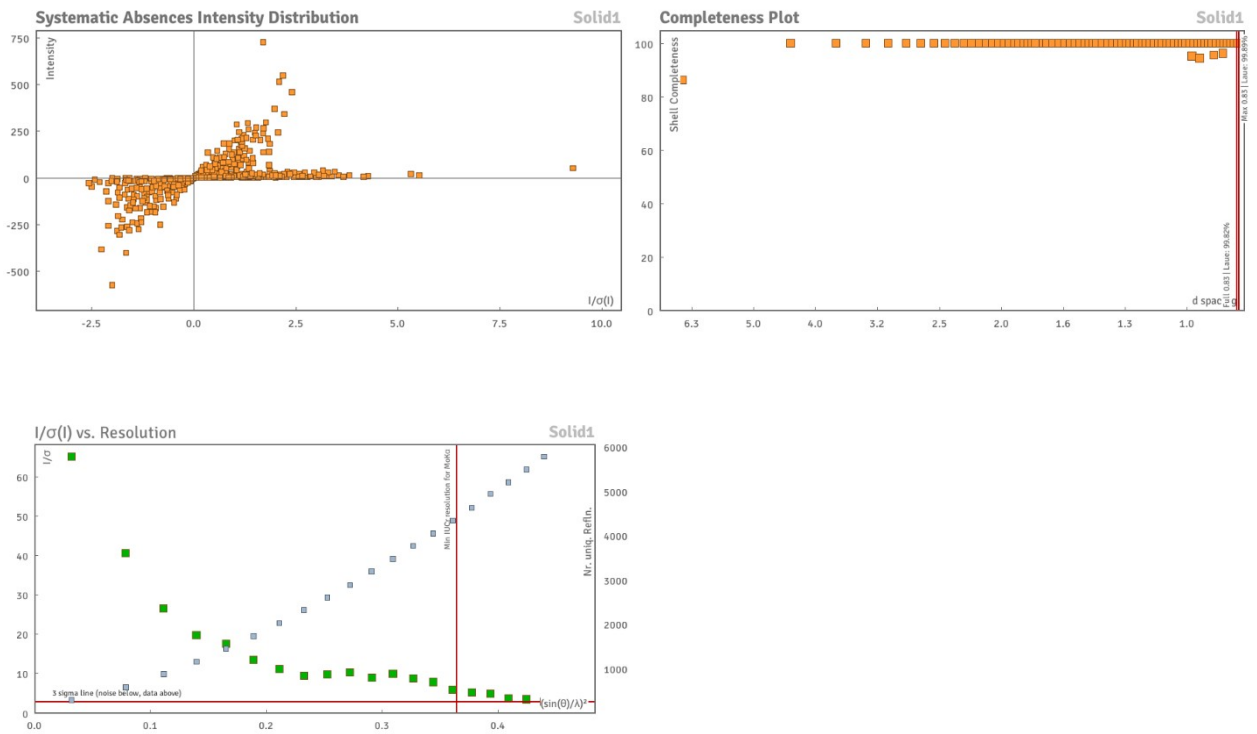

## Data Plots: Refinement and Data

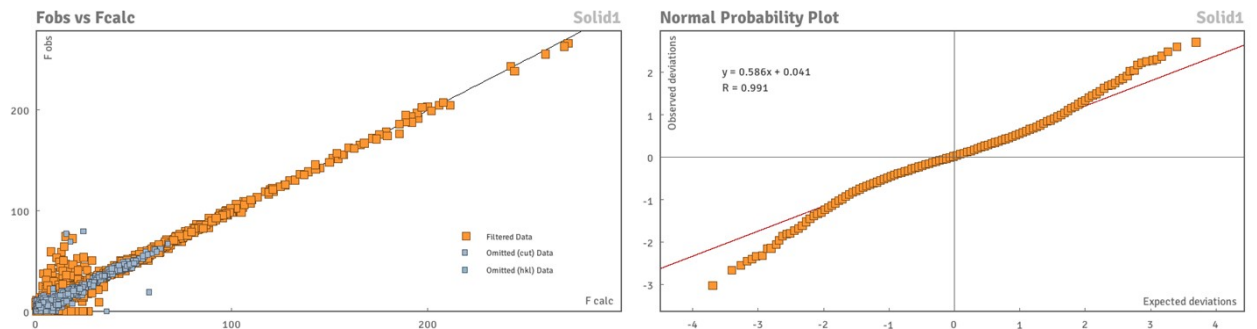

## Reflection Statistics

|                                     |                                       |                            |                 |
|-------------------------------------|---------------------------------------|----------------------------|-----------------|
| Total reflections (after filtering) | 37885                                 | Unique reflections         | 4522            |
| Completeness                        | 0.999                                 | Mean $I/\sigma$            | 17.83           |
| $hkl_{\max}$ collected              | (8, 16, 35)                           | $hkl_{\min}$ collected     | (-10, -16, -34) |
| $hkl_{\max}$ used                   | (9, 14, 31)                           | $hkl_{\min}$ used          | (-9, 0, 0)      |
| Lim $d_{\max}$ collected            | 100.0                                 | Lim $d_{\min}$ collected   | 0.83            |
| $d_{\max}$ used                     | 8.98                                  | $d_{\min}$ used            | 0.83            |
| Friedel pairs                       | 7687                                  | Friedel pairs merged       | 1               |
| Inconsistent equivalents            | 483                                   | $R_{\text{int}}$           | 0.0968          |
| $R_{\text{sigma}}$                  | 0.061                                 | Intensity transformed      | 0               |
| Omitted reflections                 | 6                                     | Omitted by user (OMIT hkl) | 0               |
| Multiplicity                        | (5438, 6538, 5008, 1874, 528, 86, 11) | Maximum multiplicity       | 21              |
| Removed systematic absences         | 1021                                  | Filtered off (Shel/OMIT)   | 6376            |

**Table S5: Selected Bond Lengths in Å for Solid1.**

| Atom | Atom            | Length/Å |
|------|-----------------|----------|
| Cd1  | O1              | 2.235(3) |
| Cd1  | O1 <sup>1</sup> | 2.235(3) |
| Cd1  | O3 <sup>2</sup> | 2.247(4) |
| Cd1  | O3 <sup>3</sup> | 2.247(4) |
| Cd2  | O2 <sup>4</sup> | 2.250(3) |
| Cd2  | O2              | 2.250(3) |
| Cd2  | O4 <sup>3</sup> | 2.251(3) |
| Cd2  | O4 <sup>5</sup> | 2.251(3) |

| Atom | Atom             | Length/Å  |
|------|------------------|-----------|
| Cd2  | O5 <sup>4</sup>  | 2.266(9)  |
| Cd2  | O5               | 2.266(9)  |
| Cd2  | O5A <sup>4</sup> | 2.231(10) |
| Cd2  | O5A              | 2.231(10) |
| O4   | Cd2 <sup>6</sup> | 2.251(3)  |
| O3   | Cd1 <sup>7</sup> | 2.247(4)  |

-----  
<sup>1</sup>3/2-x,+y,1/2-z; <sup>2</sup>1+x,-1+y,+z; <sup>3</sup>1/2-x,-1+y,1/2-z; <sup>4</sup>1/2-x,+y,1/2-z; <sup>5</sup>x,-1+y,+z; <sup>6</sup>+x,1+y,+z; <sup>7</sup>-1+x,1+y,+z

**Table S6: Selected Bond Angles in ° for Solid1.**

| Atom             | Atom | Atom            | Angle/°    |
|------------------|------|-----------------|------------|
| O1               | Cd1  | O1 <sup>1</sup> | 100.92(18) |
| O1               | Cd1  | O3 <sup>2</sup> | 86.28(13)  |
| O1               | Cd1  | O3 <sup>3</sup> | 157.22(13) |
| O1 <sup>1</sup>  | Cd1  | O3 <sup>3</sup> | 86.28(13)  |
| O1 <sup>1</sup>  | Cd1  | O3 <sup>2</sup> | 157.22(13) |
| O3 <sup>3</sup>  | Cd1  | O3 <sup>2</sup> | 95.38(18)  |
| O2               | Cd2  | O2 <sup>4</sup> | 92.47(16)  |
| O2               | Cd2  | O4 <sup>5</sup> | 166.73(14) |
| O2               | Cd2  | O4 <sup>3</sup> | 90.31(11)  |
| O2 <sup>4</sup>  | Cd2  | O4 <sup>3</sup> | 166.73(14) |
| O2 <sup>4</sup>  | Cd2  | O4 <sup>5</sup> | 90.31(11)  |
| O2 <sup>4</sup>  | Cd2  | O5 <sup>4</sup> | 102.5(3)   |
| O2               | Cd2  | O5              | 102.5(3)   |
| O2 <sup>4</sup>  | Cd2  | O5              | 80.2(5)    |
| O2               | Cd2  | O5 <sup>4</sup> | 80.2(5)    |
| O4 <sup>5</sup>  | Cd2  | O4 <sup>3</sup> | 89.93(19)  |
| O4 <sup>3</sup>  | Cd2  | O5 <sup>4</sup> | 90.7(3)    |
| O4 <sup>5</sup>  | Cd2  | O5 <sup>4</sup> | 86.6(5)    |
| O4 <sup>5</sup>  | Cd2  | O5              | 90.8(3)    |
| O4 <sup>3</sup>  | Cd2  | O5              | 86.6(5)    |
| O5 <sup>4</sup>  | Cd2  | O5              | 176.2(9)   |
| O5A              | Cd2  | O2 <sup>4</sup> | 84.2(6)    |
| O5A <sup>4</sup> | Cd2  | O2              | 84.2(6)    |
| O5A              | Cd2  | O2              | 92.6(4)    |
| O5A <sup>4</sup> | Cd2  | O2 <sup>4</sup> | 92.6(4)    |
| O5A <sup>4</sup> | Cd2  | O4 <sup>3</sup> | 100.6(4)   |
| O5A              | Cd2  | O4 <sup>3</sup> | 82.7(6)    |
| O5A <sup>4</sup> | Cd2  | O4 <sup>5</sup> | 82.7(6)    |
| O5A              | Cd2  | O4 <sup>5</sup> | 100.6(4)   |
| O5A <sup>4</sup> | Cd2  | O5A             | 175.5(11)  |

<sup>1</sup>3/2-x,+y,1/2-z; <sup>2</sup>1+x,-1+y,+z; <sup>3</sup>1/2-x,-1+y,1/2-z; <sup>4</sup>1/2-x,+y,1/2-z; <sup>5</sup>x,-1+y,+z; <sup>6</sup>+x,1+y,+z; <sup>7</sup>-1+x,1+y,+z

## Solid2

$R_1=4.98\%$

### Crystal Data and Experimental

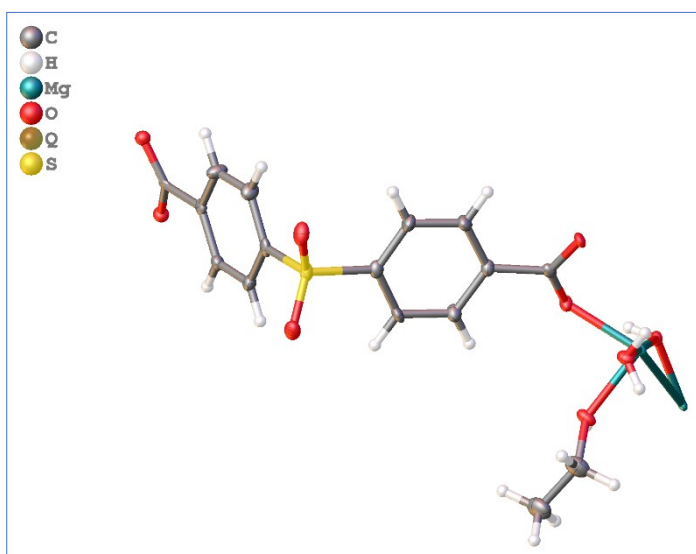

**Experimental.** Single Colourless needle-shaped crystals of **Solid2** were used as supplied. A suitable crystal with dimensions  $0.30 \times 0.20 \times 0.10 \text{ mm}^3$  was selected and mounted on a Bruker APEX-II CCD diffractometer. The crystal was kept at a steady  $T = 100 \text{ K}$  during data collection. The structure was solved with the olex2.solve 1.5 (Bourhis et al., 2015) solution program using iterative methods and by using Olex2 1.5 (Dolomanov et al., 2009) as the graphical interface. The model was refined with XL (Sheldrick, 2008) using full matrix least squares minimisation on  $F^2$ .

**Crystal Data.**  $\text{C}_{36}\text{H}_{43}\text{Mg}_3\text{NO}_{19}\text{S}_2$ ,  $M_r = 930.76$ , monoclinic,  $C2/c$  (No. 15),  $a = 25.095(16) \text{ \AA}$ ,  $b = 6.440(4) \text{ \AA}$ ,  $c = 28.376(18) \text{ \AA}$ ,  $\beta = 114.671(18)^\circ$ ,  $\alpha = \gamma = 90^\circ$ ,  $V = 4168(5) \text{ \AA}^3$ ,  $T = 100 \text{ K}$ ,  $Z = 4$ ,  $Z' = 0.5$ ,  $\mu(\text{MoK}\alpha) = 0.253$ , 7133 reflections measured, 3231 unique ( $R_{\text{int}} = 0.0991$ ) which were used in all calculations. The final  $wR_2$  was 0.1356 (all data) and  $R_1$  was 0.0498 ( $I \geq 2 \sigma(I)$ ).

| Compound                              | Solid2                                                          |
|---------------------------------------|-----------------------------------------------------------------|
| Formula                               | $\text{C}_{36}\text{H}_{43}\text{Mg}_3\text{NO}_{19}\text{S}_2$ |
| $D_{\text{calc.}} / \text{g cm}^{-3}$ | 1.483                                                           |
| $\mu / \text{mm}^{-1}$                | 0.253                                                           |
| Formula Weight                        | 930.76                                                          |
| Colour                                | Colorless                                                       |
| Shape                                 | needle-shaped                                                   |
| Size/ $\text{mm}^3$                   | $0.30 \times 0.20 \times 0.10$                                  |
| $T / \text{K}$                        | 100                                                             |
| Crystal System                        | monoclinic                                                      |
| Space Group                           | $C2/c$                                                          |
| $a / \text{ \AA}$                     | 25.095(16)                                                      |
| $b / \text{ \AA}$                     | 6.440(4)                                                        |
| $c / \text{ \AA}$                     | 28.376(18)                                                      |
| $\alpha / ^\circ$                     | 90                                                              |
| $\beta / ^\circ$                      | 114.671(18)                                                     |
| $\gamma / ^\circ$                     | 90                                                              |
| $V / \text{ \AA}^3$                   | 4168(5)                                                         |
| $Z$                                   | 4                                                               |
| $Z'$                                  | 0.5                                                             |
| Wavelength/ $\text{ \AA}$             | 0.71073                                                         |
| Radiation type                        | $\text{MoK}\alpha$                                              |
| $\theta_{\text{min}} / ^\circ$        | 2.836                                                           |
| $\theta_{\text{max}} / ^\circ$        | 23.995                                                          |
| Measured Refl's.                      | 7133                                                            |
| Indep't Refl's                        | 3231                                                            |
| Refl's $I \geq 2 \sigma(I)$           | 2564                                                            |
| $R_{\text{int}}$                      | 0.0991                                                          |
| Parameters                            | 257                                                             |
| Restraints                            | 0                                                               |
| Largest Peak                          | 0.340                                                           |
| Deepest Hole                          | -0.581                                                          |
| GooF                                  | 1.041                                                           |
| $wR_2$ (all data)                     | 0.1356                                                          |
| $wR_2$                                | 0.1262                                                          |
| $R_1$ (all data)                      | 0.0659                                                          |
| $R_1$                                 | 0.0498                                                          |

## Structure Quality Indicators

|                     |                                            |      |                 |      |                |       |            |       |
|---------------------|--------------------------------------------|------|-----------------|------|----------------|-------|------------|-------|
| <b>Reflections:</b> | d min (MoK $\alpha$ )<br>2 $\theta$ =48.0° | 0.87 | I/ $\sigma$ (I) | 14.2 | Rint<br>m=2.35 | 9.91% | Full 48.0° | 98.7  |
| <b>Refinement:</b>  |                                            |      | Max Peak        | 0.3  | Min Peak       | -0.6  | Goof       | 1.041 |

A Colourless needle-shaped crystal with dimensions 0.30 × 0.20 × 0.10 mm<sup>3</sup> was mounted. Data were collected using a Bruker APEX-II CCD diffractometer operating at  $T = 100$  K.

Data were measured using  $\phi$  and  $\omega$  scans with MoK $\alpha$  radiation. The diffraction pattern was indexed and the total number of runs and images was based on the strategy calculation from the program Bruker D8 Quest. The maximum resolution that was achieved was  $\theta = 23.995^\circ$  (0.87 Å).

The unit cell was refined using SAINT v8.37A (Bruker, 2015) on 3358 reflections, 47% of the observed reflections.

Data reduction, scaling and absorption corrections were performed using SAINT v8.37A (Bruker, 2015). The final completeness is 98.60 % out to 23.995° in  $\theta$ . A multi-scan absorption correction was performed. The absorption coefficient  $\mu$  of this material is 0.253 mm<sup>-1</sup> at this wavelength ( $\lambda = 0.71073\text{Å}$ ) and the minimum and maximum transmissions are 0 and 0.

The structure was solved and the space group  $C2/c$  (# 15) determined by the olex2.solve 1.5 (Bourhis et al., 2015) structure solution program using iterative methods and refined by full matrix least squares minimisation on  $F^2$  using version 2014/7 of XL (Sheldrick, 2008). All non-hydrogen atoms were refined anisotropically. Hydrogen atom positions were calculated geometrically and refined using the riding model. Most hydrogen atom positions were calculated geometrically and refined using the riding model, but some hydrogen atoms were refined freely.

*\_smtbx\_masks\_special\_details:* A solvent mask was calculated and 196 electrons were found in a volume of 752Å<sup>3</sup> in 1 void per unit cell. This is consistent with the presence of 1[C4H9NO] per formula unit which account for 192 electrons per unit cell.

The value of  $Z'$  is 0.5. This means that only half of the formula unit is present in the asymmetric unit, with the other half consisting of symmetry equivalent atoms. The moiety formula is C32 H34 Mg3 O18 S2, 1[C4H9NO].

## Data Plots: Diffraction Data

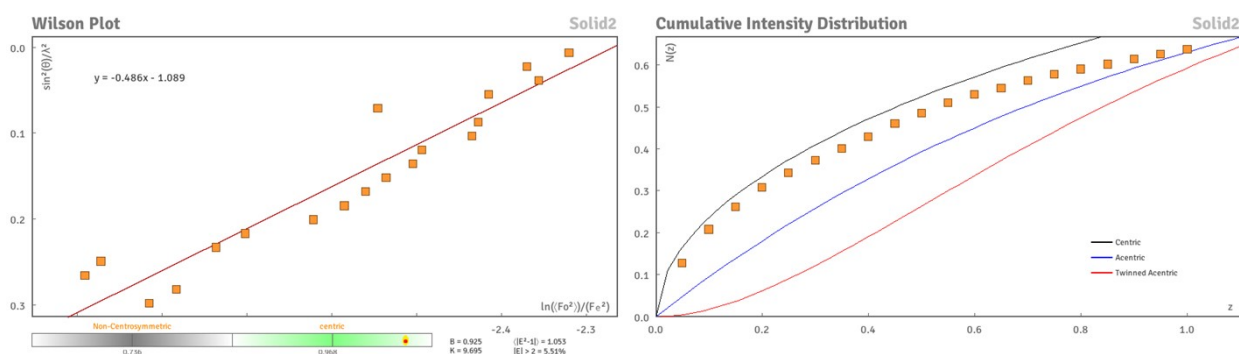

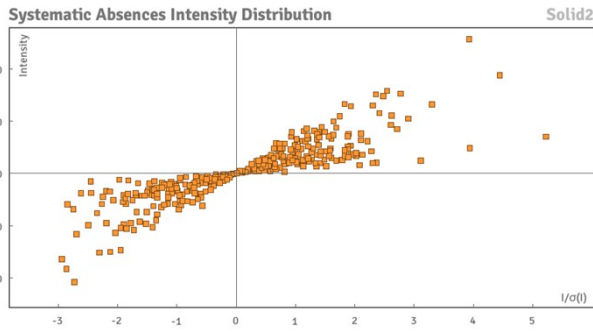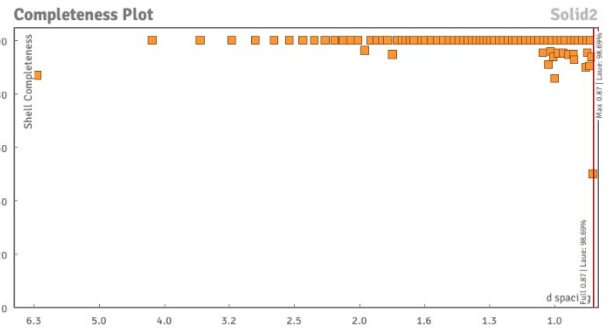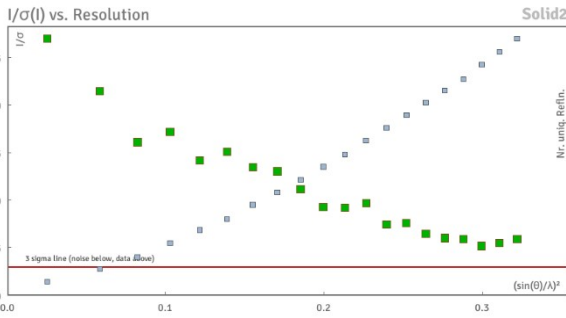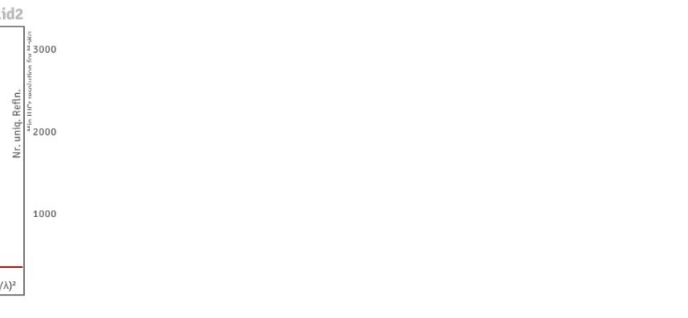

## Data Plots: Refinement and Data

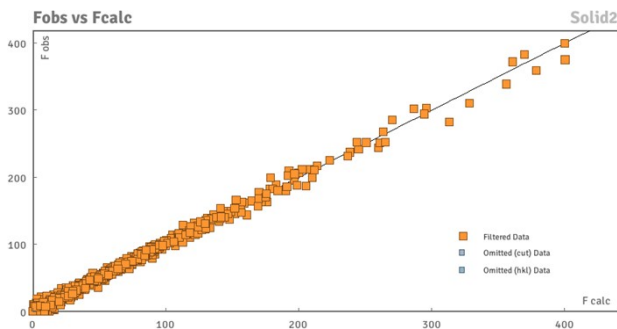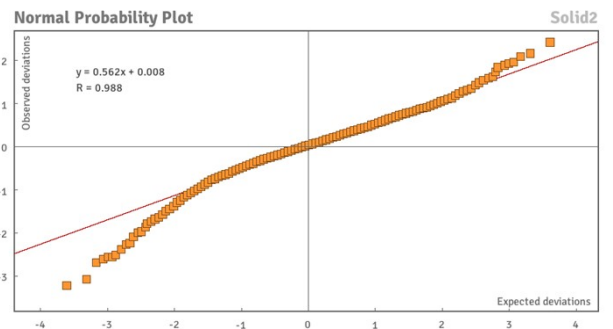

## Reflection Statistics

|                                     |             |                            |                |
|-------------------------------------|-------------|----------------------------|----------------|
| Total reflections (after filtering) | 7581        | Unique reflections         | 3231           |
| Completeness                        | 0.987       | Mean $I/\sigma$            | 11.4           |
| $hkl_{max}$ collected               | (28, 7, 32) | $hkl_{min}$ collected      | (-23, -7, -32) |
| $hkl_{max}$ used                    | (26, 7, 32) | $hkl_{min}$ used           | (-28, 0, 0)    |
| Lim $d_{max}$ collected             | 100.0       | Lim $d_{min}$ collected    | 0.84           |
| $d_{max}$ used                      | 9.12        | $d_{min}$ used             | 0.87           |
| Friedel pairs                       | 1448        | Friedel pairs merged       | 1              |
| Inconsistent equivalents            | 263         | $R_{int}$                  | 0.0991         |
| $R_{sigma}$                         | 0.0707      | Intensity transformed      | 0              |
| Omitted reflections                 | 0           | Omitted by user (OMIT hkl) | 0              |
| Multiplicity                        | (6853, 364) | Maximum multiplicity       | 6              |
| Removed systematic absences         | 448         | Filtered off (Shel/OMIT)   | 0              |

**Table S7: Selected Bond Lengths in Å for Solid2.**

| Atom | Atom             | Length/Å |
|------|------------------|----------|
| Mg2  | Mg1 <sup>1</sup> | 3.554(2) |
| Mg2  | Mg1 <sup>2</sup> | 3.568(2) |
| Mg2  | Mg1              | 3.554(2) |
| Mg2  | Mg1 <sup>3</sup> | 3.568(2) |
| Mg2  | O2 <sup>1</sup>  | 2.050(2) |
| Mg2  | O2               | 2.050(2) |
| Mg2  | O9 <sup>4</sup>  | 2.084(2) |
| Mg2  | O9 <sup>5</sup>  | 2.084(2) |
| Mg2  | O5 <sup>3</sup>  | 2.094(2) |
| Mg2  | O5 <sup>2</sup>  | 2.094(2) |
| Mg2  | H2               | 2.41(4)  |
| Mg1  | Mg2 <sup>6</sup> | 3.568(2) |
| Mg1  | Mg1 <sup>2</sup> | 3.040(3) |

| Atom | Atom             | Length/Å |
|------|------------------|----------|
| Mg1  | O2 <sup>2</sup>  | 2.054(2) |
| Mg1  | O2               | 2.045(2) |
| Mg1  | O4               | 2.079(2) |
| Mg1  | O8 <sup>5</sup>  | 2.088(3) |
| Mg1  | O1               | 2.104(2) |
| Mg1  | O3               | 2.102(2) |
| Mg1  | H2               | 2.33(4)  |
| O2   | Mg1 <sup>2</sup> | 2.055(2) |
| O9   | Mg2 <sup>7</sup> | 2.084(2) |
| O5   | Mg2 <sup>6</sup> | 2.094(2) |
| O8   | Mg1 <sup>8</sup> | 2.088(2) |

-----  
<sup>1</sup>1-x,2-y,1-z; <sup>2</sup>1-x,1-y,1-z; <sup>3</sup>+x,1+y,+z; <sup>4</sup>1-x,1+y,3/2-z; <sup>5</sup>+x,1-y,-1/2+z; <sup>6</sup>+x,-1+y,+z; <sup>7</sup>1-x,-1+y,3/2-z; <sup>8</sup>+x,1-y,1/2+z

**Table S8: Selected Bond Angles in ° for Solid2.**

| Atom             | Atom | Atom             | Angle/°     |
|------------------|------|------------------|-------------|
| Mg1              | Mg2  | Mg1 <sup>1</sup> | 179.999(12) |
| Mg1 <sup>2</sup> | Mg2  | Mg1 <sup>3</sup> | 180.0       |
| Mg1 <sup>1</sup> | Mg2  | Mg1 <sup>3</sup> | 129.47(5)   |
| Mg1              | Mg2  | Mg1 <sup>2</sup> | 129.47(5)   |
| Mg1 <sup>1</sup> | Mg2  | Mg1 <sup>2</sup> | 50.53(5)    |
| Mg1              | Mg2  | Mg1 <sup>3</sup> | 50.53(5)    |
| Mg1 <sup>2</sup> | Mg2  | H2               | 138.5(9)    |
| Mg1 <sup>1</sup> | Mg2  | H2               | 139.4(9)    |
| Mg1              | Mg2  | H2               | 40.6(9)     |
| Mg1 <sup>3</sup> | Mg2  | H2               | 41.5(9)     |
| O2 <sup>1</sup>  | Mg2  | Mg1 <sup>2</sup> | 29.66(6)    |
| O2               | Mg2  | Mg1              | 29.73(6)    |
| O2               | Mg2  | Mg1 <sup>1</sup> | 150.27(6)   |
| O2 <sup>1</sup>  | Mg2  | Mg1              | 150.27(6)   |
| O2 <sup>1</sup>  | Mg2  | Mg1 <sup>1</sup> | 29.73(6)    |
| O2 <sup>1</sup>  | Mg2  | Mg1 <sup>3</sup> | 150.34(6)   |
| O2               | Mg2  | Mg1 <sup>3</sup> | 29.66(6)    |
| O2               | Mg2  | Mg1 <sup>2</sup> | 150.34(6)   |
| O2 <sup>1</sup>  | Mg2  | O2               | 180.0       |
| O2 <sup>1</sup>  | Mg2  | O9 <sup>4</sup>  | 94.46(8)    |
| O2               | Mg2  | O9 <sup>4</sup>  | 85.54(8)    |
| O2 <sup>1</sup>  | Mg2  | O9 <sup>5</sup>  | 85.54(8)    |
| O2               | Mg2  | O9 <sup>5</sup>  | 94.46(8)    |
| O2 <sup>1</sup>  | Mg2  | O5 <sup>2</sup>  | 94.75(8)    |
| O2 <sup>1</sup>  | Mg2  | O5 <sup>3</sup>  | 85.25(8)    |
| O2               | Mg2  | O5 <sup>2</sup>  | 85.24(8)    |
| O2               | Mg2  | O5 <sup>3</sup>  | 94.76(8)    |
| O2               | Mg2  | H2               | 17.3(9)     |
| O2 <sup>1</sup>  | Mg2  | H2               | 162.7(9)    |
| O9 <sup>5</sup>  | Mg2  | Mg1 <sup>1</sup> | 114.30(6)   |
| O9 <sup>4</sup>  | Mg2  | Mg1 <sup>1</sup> | 65.70(6)    |
| O9 <sup>4</sup>  | Mg2  | Mg1 <sup>3</sup> | 78.93(6)    |
| O9 <sup>5</sup>  | Mg2  | Mg1 <sup>2</sup> | 78.93(6)    |

| Atom             | Atom | Atom             | Angle/°   |
|------------------|------|------------------|-----------|
| O9 <sup>4</sup>  | Mg2  | Mg1 <sup>2</sup> | 101.07(6) |
| O9 <sup>5</sup>  | Mg2  | Mg1              | 65.70(6)  |
| O9 <sup>4</sup>  | Mg2  | Mg1              | 114.30(6) |
| O9 <sup>5</sup>  | Mg2  | Mg1 <sup>3</sup> | 101.07(6) |
| O9 <sup>5</sup>  | Mg2  | O9 <sup>4</sup>  | 180.0     |
| O9 <sup>4</sup>  | Mg2  | O5 <sup>3</sup>  | 89.98(10) |
| O9 <sup>5</sup>  | Mg2  | O5 <sup>3</sup>  | 90.02(10) |
| O9 <sup>5</sup>  | Mg2  | O5 <sup>2</sup>  | 89.98(10) |
| O9 <sup>4</sup>  | Mg2  | O5 <sup>2</sup>  | 90.02(10) |
| O9 <sup>5</sup>  | Mg2  | H2               | 105.9(9)  |
| O9 <sup>4</sup>  | Mg2  | H2               | 74.1(9)   |
| O5 <sup>3</sup>  | Mg2  | Mg1              | 101.42(6) |
| O5 <sup>3</sup>  | Mg2  | Mg1 <sup>2</sup> | 113.96(6) |
| O5 <sup>2</sup>  | Mg2  | Mg1 <sup>3</sup> | 113.96(6) |
| O5 <sup>2</sup>  | Mg2  | Mg1              | 78.58(6)  |
| O5 <sup>3</sup>  | Mg2  | Mg1 <sup>3</sup> | 66.04(6)  |
| O5 <sup>3</sup>  | Mg2  | Mg1 <sup>1</sup> | 78.58(6)  |
| O5 <sup>2</sup>  | Mg2  | Mg1 <sup>1</sup> | 101.42(6) |
| O5 <sup>2</sup>  | Mg2  | Mg1 <sup>2</sup> | 66.04(6)  |
| O5 <sup>3</sup>  | Mg2  | O5 <sup>2</sup>  | 180.0     |
| O5 <sup>3</sup>  | Mg2  | H2               | 107.3(9)  |
| O5 <sup>2</sup>  | Mg2  | H2               | 72.7(9)   |
| Mg2              | Mg1  | Mg2 <sup>6</sup> | 129.47(5) |
| Mg2 <sup>6</sup> | Mg1  | H2               | 101.2(9)  |
| Mg2              | Mg1  | H2               | 42.4(9)   |
| Mg1 <sup>3</sup> | Mg1  | Mg2 <sup>6</sup> | 64.50(4)  |
| Mg1 <sup>3</sup> | Mg1  | Mg2              | 64.97(4)  |
| Mg1 <sup>3</sup> | Mg1  | H2               | 50.5(9)   |
| O2               | Mg1  | Mg2              | 29.82(6)  |
| O2 <sup>3</sup>  | Mg1  | Mg2 <sup>6</sup> | 29.59(6)  |
| O2 <sup>3</sup>  | Mg1  | Mg2              | 103.73(8) |
| O2               | Mg1  | Mg2 <sup>6</sup> | 103.51(8) |
| O2               | Mg1  | Mg1 <sup>3</sup> | 42.26(7)  |

| Atom            | Atom | Atom             | Angle/°    |
|-----------------|------|------------------|------------|
| O2 <sup>3</sup> | Mg1  | Mg1 <sup>3</sup> | 42.00(7)   |
| O2              | Mg1  | O2 <sup>3</sup>  | 84.26(11)  |
| O2              | Mg1  | O4               | 92.10(10)  |
| O2 <sup>3</sup> | Mg1  | O4               | 94.30(10)  |
| O2              | Mg1  | O8 <sup>5</sup>  | 95.06(10)  |
| O2 <sup>3</sup> | Mg1  | O8 <sup>5</sup>  | 92.11(10)  |
| O2 <sup>3</sup> | Mg1  | O1               | 176.30(10) |
| O2              | Mg1  | O1               | 92.76(10)  |
| O2              | Mg1  | O3               | 176.71(10) |
| O2 <sup>3</sup> | Mg1  | O3               | 92.61(10)  |
| O2 <sup>3</sup> | Mg1  | H2               | 90.1(9)    |
| O2              | Mg1  | H2               | 18.7(9)    |
| O4              | Mg1  | Mg2 <sup>6</sup> | 71.51(6)   |
| O4              | Mg1  | Mg2              | 112.51(7)  |
| O4              | Mg1  | Mg1 <sup>3</sup> | 94.32(7)   |
| O4              | Mg1  | O8 <sup>5</sup>  | 170.83(9)  |
| O4              | Mg1  | O1               | 83.58(9)   |
| O4              | Mg1  | O3               | 89.17(9)   |
| O4              | Mg1  | H2               | 74.0(9)    |
| O8 <sup>5</sup> | Mg1  | Mg2              | 72.13(7)   |
| O8 <sup>5</sup> | Mg1  | Mg2 <sup>6</sup> | 112.17(7)  |
| O8 <sup>5</sup> | Mg1  | Mg1 <sup>3</sup> | 94.83(7)   |
| O8 <sup>5</sup> | Mg1  | O1               | 90.35(9)   |
| O8 <sup>5</sup> | Mg1  | O3               | 84.00(9)   |
| O8 <sup>5</sup> | Mg1  | H2               | 112.6(10)  |
| O1              | Mg1  | Mg2 <sup>6</sup> | 150.46(7)  |
| O1              | Mg1  | Mg2              | 74.41(8)   |
| O1              | Mg1  | Mg1 <sup>3</sup> | 134.98(8)  |
| O1              | Mg1  | H2               | 86.4(9)    |
| O3              | Mg1  | Mg2              | 151.29(7)  |
| O3              | Mg1  | Mg2 <sup>6</sup> | 74.02(8)   |
| O3              | Mg1  | Mg1 <sup>3</sup> | 134.61(8)  |
| O3              | Mg1  | O1               | 90.40(10)  |
| O3              | Mg1  | H2               | 163.1(9)   |

-----  
<sup>1</sup>1-x,2-y,1-z; <sup>2</sup>+x,1+y,+z; <sup>3</sup>1-x,1-y,1-z; <sup>4</sup>1-x,1+y,3/2-z; <sup>5</sup>+x,1-y,-1/2+z; <sup>6</sup>+x,-1+y,+z; <sup>7</sup>1-x,-1+y,3/2-z; <sup>8</sup>+x,1-y,1/2+z

## Citations

Bruker D8 Quest

L.J. Bourhis and O.V. Dolomanov and R.J. Gildea and J.A.K. Howard and H. Puschmann, The Anatomy of a Comprehensive Constrained, Restrained, Refinement Program for the Modern Computing Environment - Olex2 Disected, *Acta Cryst. A*, (2015), **A71**, 59-71.

O.V. Dolomanov and L.J. Bourhis and R.J. Gildea and J.A.K. Howard and H. Puschmann, Olex2: A complete structure solution, refinement and analysis program, *J. Appl. Cryst.*, (2009), **42**, 339-341.

Sheldrick, G.M., Crystal structure refinement with ShelXL, *Acta Cryst.*, (2015), **C71**, 3-8.

Software for the Integration of CCD Detector System Bruker Analytical X-ray Systems, Bruker axs, Madison, WI (after 2013).



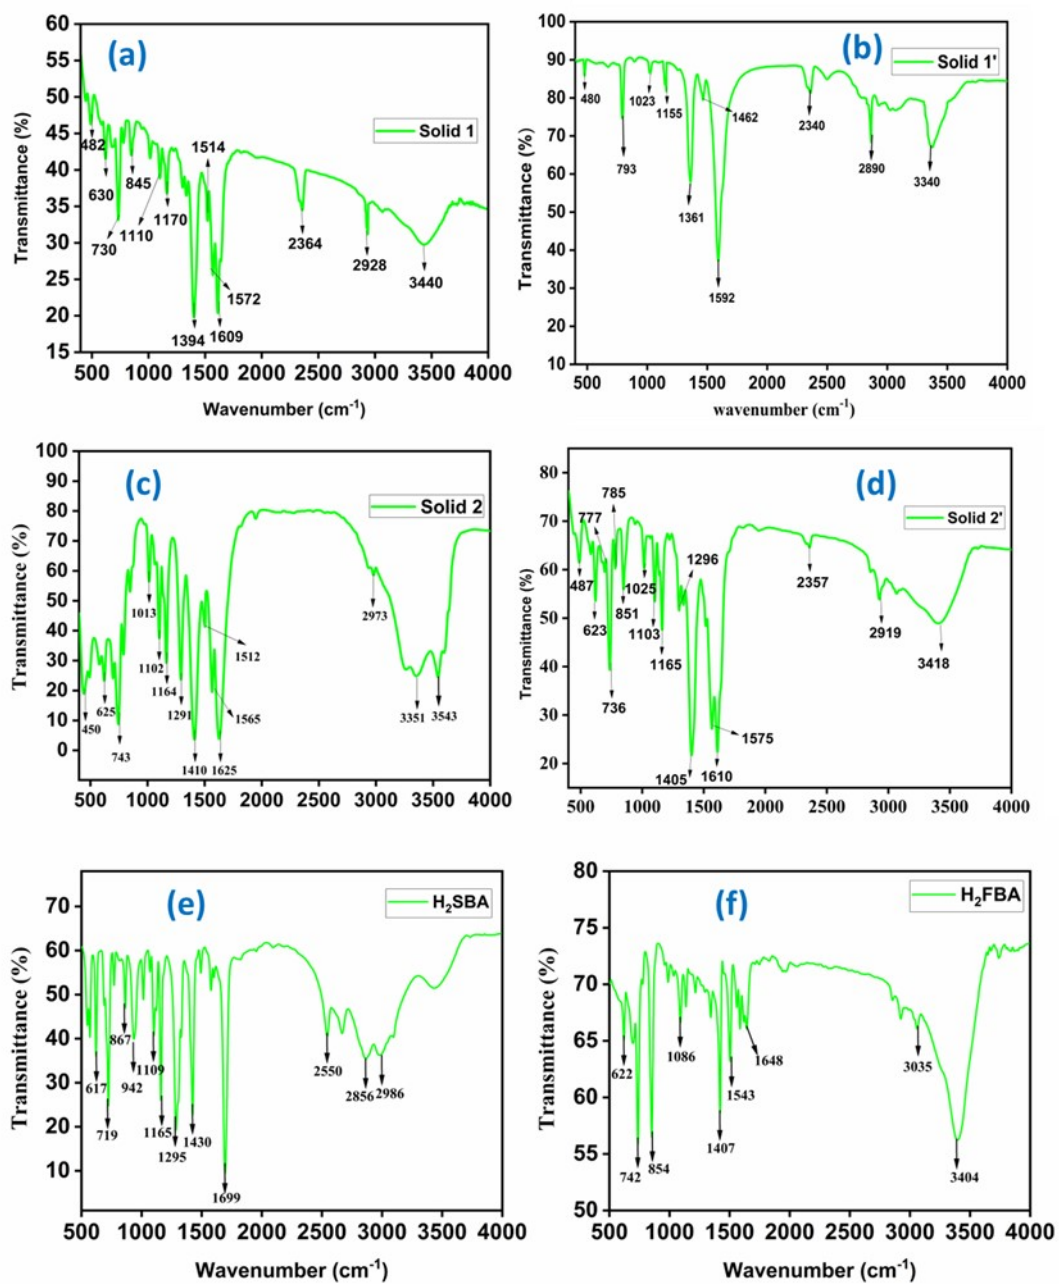

Fig. S6 FT-IR spectra of solids (a) **1**, (c) **2**, (b) **1'**, (d) **2'**, (e)  $\text{H}_2\text{SBA}$  and (f)  $\text{H}_2\text{FBA}$

**Table S9:** Selected vibrational frequencies (cm<sup>-1</sup>) for reported solids

|                 | Solid <b>1</b> | Solid <b>1'</b> |                 | Solid <b>2</b> | Solid <b>2'</b> |
|-----------------|----------------|-----------------|-----------------|----------------|-----------------|
| Cd-O stretch    | 482            | 480             | Mg-O stretch    | 450            | 487             |
| C-S stretch     | —              | —               | C-S stretch     | 1013           | 1025            |
| Cd-O-Cd Bending | 730            | 793             | Mg-O-Mg Bending | 743            | 736             |
| C-F stretch     | 1170           | 1023            | S=O stretch     | 1013           | 1025            |
| C-O stretch     | 1320           | 1361            | C-O stretch     | 1410           | 1405            |
| C-N (solvent)   | 1514           | —               | C-N (solvent)   | 1500           | —               |
| C=C (aromatic)  | 1394           | 1361            | C=C (aromatic)  | 1291           | 1296            |
| C=O (solvent)   | 1609           | 1592            | C=O (solvent)   | 1625           | 1610            |
| -OH stretch     | 3440           | 3340            | -OH stretch     | 3418           | 3543            |

FT-IR spectra for solids **1** and **1'** with *FBA* ligand, displayed broad peak at 3440 cm<sup>-1</sup> and 3340 cm<sup>-1</sup> for O–H stretching of the carboxylic acid. However, the absence of water and corresponding hydrogen bonds can be felt in the absence of dominant broad peaks around 3300 cm<sup>-1</sup> in solid **1'**. Sharp peaks around 2890cm<sup>-1</sup> for **1** and 2928cm<sup>-1</sup> for **1'** represent the sp<sup>2</sup> of the aromatic ring. Peaks from 1609 and 1592 cm<sup>-1</sup> depict the symmetric stretch of carboxylate while the peaks around 1572-1462 cm<sup>-1</sup> resulted from the asymmetric stretch of carbonyl of acid in solid **1** and **1'**. Multiple sharp peaks ranging from ~1390 to 1360cm<sup>-1</sup> are from symmetric and antisymmetric stretch of C=C which is at lower end compared to isolated C=C depicting a partial single bond owing to resonance in the ring of solid **1** and **1'**. Peaks around 1170 cm<sup>-1</sup> and 1110cm<sup>-1</sup> in solid **1** as well as peaks around 1155 cm<sup>-1</sup> and 1023 cm<sup>-1</sup> in **1'** are from the asymmetric C–F bonds and syllinetrical stretching respectively. Presence of peaks near 845cm<sup>-1</sup>, 793cm<sup>-1</sup>, 630cm<sup>-1</sup> indicate the para-substitution of phenyl rings. The stretching peaks near 730-740cm<sup>-1</sup> depict the presence of Cd–O–Cd bond. Cd-O symmetric stretch appears near 482–450cm<sup>-1</sup>. The stretching peak at 1514cm<sup>-1</sup> is due to the C–N bond whereas in **1'** this peak disappeared.

In solid **2**, EtOH and H<sub>2</sub>O molecule displayed broad peaks peak at 3543 cm<sup>-1</sup> and 3351 cm<sup>-1</sup>. The broad range is because of the water, EtOH and presence of a hydrogen bonding in the vicinity of the oxygen. For solid **2'**, the broad peaks at 3418 cm<sup>-1</sup> suggested the μ<sub>3</sub>-OH and -OH stretching of carboxylic group. The absence of C–N bond stretching peaks near 1500 cm<sup>-1</sup> in **2'** concluded that solvent molecules has been removed from the sample. The stretching peaks for **2** near 1013cm<sup>-1</sup> and 1102 cm<sup>-1</sup> as well as stretching peaks for **2'** near 1025cm<sup>-1</sup> and 1125cm<sup>-1</sup> depicts the presence of C–S bond. The asymmetric and symmetric O=S=O occur as strong absorption band near 1164 cm<sup>-1</sup> and 1410 cm<sup>-1</sup> for **2** and 1165cm<sup>-1</sup> and 1405 cm<sup>-1</sup> **2'** respectively. C=O symmetric stretch near 1291cm<sup>-1</sup> and asymmetric around 1625 cm<sup>-1</sup> in solid **2** and 1296cm<sup>-1</sup>, 1610cm<sup>-1</sup> in **2'** is due to the combination of the donation of electron to the metal and strong electronic effect present from the two sulfonyl oxygens which is a typical electron withdrawing effect. The stretching peaks near 743 and 736 cm<sup>-1</sup> depict the presence of Mg–O–Mg bond in solid **2** and **2'**. Mg–O symmetric stretch appears near 450, 487cm<sup>-1</sup> in both the solids. The stretching peaks 1013 cm<sup>-1</sup> and 1025 cm<sup>-1</sup> depicts the presence of S=O bonds in **2** and **2'**.

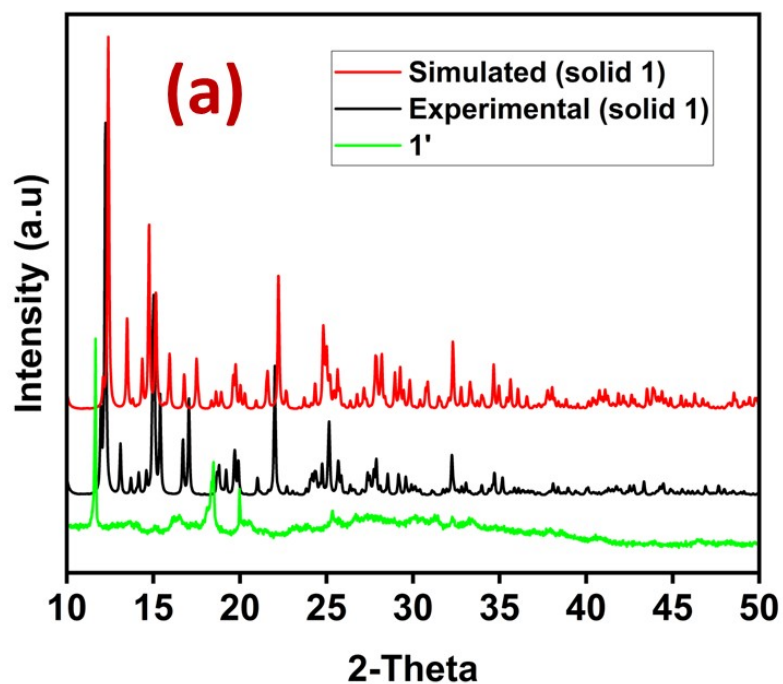

**Fig. S7** PXRd pattern comparison of simulated (solid 1), as synthesized (solid 1) and heated sample (Solid 1').

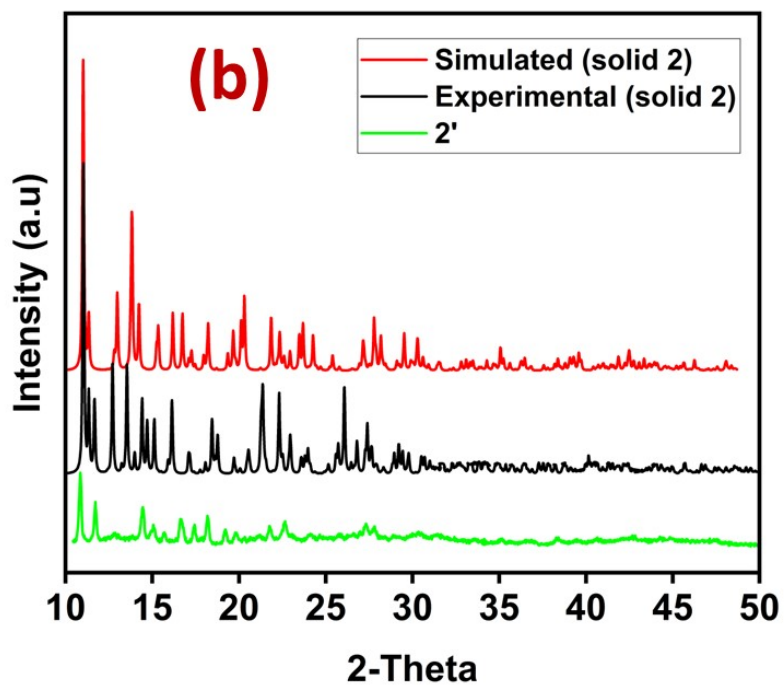

**Fig. S8** PXRd pattern comparison of simulated (solid 2), as synthesized (solid 2) and heated sample (Solid 2').

## References:

1Balendra, Sanyukta, M. Ali and S. Murugavel, *Inorganic Chemistry Communications*, 2023, **148**, 110280.
